Metabolic contributions of an alphaproteobacterial endosymbiont in the apicomplexan  
*Cardiosporidium cionae*

Elizabeth Sage Hunter<sup>1</sup>, Christopher J Paight<sup>2</sup>, Christopher E Lane<sup>1\*</sup>

<sup>1</sup>*Department of Biological Sciences, University of Rhode Island, Kingston, RI, 02881, USA.*

<sup>2</sup>*Department of Ecology, Evolution & Marine Biology, University of California, Santa Barbara, 93106 CA, USA.*

**\* Correspondence:**

Dr. Christopher Lane

clane@uri.edu

**Keywords: Apicomplexa, Parasite – Host interactions, Mutualism, Parasitism, Bacterial Endosymbiont, Alphaproteobacteria host-associated bacteria**

## 1 **Abstract**

2           Apicomplexa is a diverse protistan phylum composed almost exclusively of  
3 metazoan-infecting parasites, including the causative agents of malaria, cryptosporidiosis,  
4 and toxoplasmosis. A single apicomplexan genus, *Nephromyces*, was described in 2010 as a  
5 mutualist partner to its tunicate host. Here we present genomic and transcriptomic data  
6 from the parasitic sister species to this mutualist, *Cardiosporidium cionae*, and its  
7 associated bacterial endosymbiont. *Cardiosporidium cionae* and *Nephromyces* both infect  
8 tunicate hosts, localize to similar organs within these hosts, and maintain bacterial  
9 endosymbionts. Though many other protists are known to harbor bacterial endosymbionts,  
10 these associations are completely unknown in Apicomplexa outside of the Nephromycidae  
11 clade. Our data indicate that a vertically transmitted  $\alpha$ -proteobacteria has been retained in  
12 each lineage since *Nephromyces* and *Cardiosporidium* diverged. This  $\alpha$ -proteobacterial  
13 endosymbiont has highly reduced metabolic capabilities, but contributes the essential  
14 amino acid lysine, and essential cofactor lipoic acid to *C. cionae*. This partnership likely  
15 reduces resource competition with the tunicate host. However, our data indicate that the  
16 contribution of the single  $\alpha$ -proteobacterial endosymbiont in *C. cionae* is minimal  
17 compared to the three taxa of endosymbionts present in the *Nephromyces* system, and is a  
18 potential explanation for the virulence disparity between these lineages.

19

## 20 **Introduction**

21           Apicomplexa includes a multitude of highly virulent pathogenic organisms, such as  
22 *Plasmodium falciparum*, *Cryptosporidium parvum*, and *Toxoplasma gondii*, the causative  
23 agents of malaria, cryptosporidiosis, and toxoplasmosis, respectively. Malaria claims about

24 half a million human lives annually (Center for Disease Control 2019), *T. gondii* is estimated  
25 to infect up to 60% of the human population in much of Europe (Pappas, Roussos, and  
26 Falagas 2009), and cryptosporidiosis causes 3-5 million cases of gastrointestinal disease  
27 annually in children in Africa and India alone (Sow et al. 2016). These organisms represent  
28 major human health concerns, but as a result, our understanding of this phylum is largely  
29 based on a small subset of clinically relevant apicomplexans. Every metazoan likely plays  
30 host to at least one apicomplexan (Morrison 2009), and this is probably an  
31 underestimation, as many species can host multiple apicomplexan species. Apicomplexans  
32 have been described in a vast array of vertebrates from avians to marine mammals  
33 (Jeurissen et al. 1996; Conrad et al. 2005), and also in cnidarians (Kwong et al. 2019),  
34 molluscs (Suja et al. 2016; Dyson, Grahame, and Evennett 1993), arthropods (Criado-  
35 Fornelio et al. 2017; Alarcón et al. 2017), and urochordates (Ciancio et al. 2008; Mary Beth  
36 Saffo et al. 2010). Their host range is enormous, and their diversity and adaptation to the  
37 parasitic lifestyle is unparalleled.

38         The long history of evolution and adaptation to life within a host has given rise to a  
39 series of characteristic genomic losses and the evolution of specialized cellular machinery  
40 in apicomplexans (Roos 2005; Janouskovec and Keeling 2016; McFadden and Waller 1997;  
41 Soldati, Dubremetz, and Lebrun 2001; Fréchal et al. 2017). Specific structural adaptations of  
42 these organisms include those for functions related to host infection and persistence;  
43 namely a remnant plastid (apicoplast) and apical complex (McFadden and Waller 1997;  
44 Soldati, Dubremetz, and Lebrun 2001). Genomic reductions associated with parasitism in  
45 apicomplexans include losses in gene families for the biosynthesis of purines, amino acids,  
46 sterols, various cofactors, the glyoxylate cycle, endomembrane components, and genes

47 related to motility (Janouskovec and Keeling 2016; Woo et al. 2015). Additionally,  
48 apicomplexans also show expansions in gene families related to infection and persistence  
49 within host cells (Janouskovec and Keeling 2016). However, the assumption that these  
50 genomic signatures are associated with parasitism is based on limited information, since a  
51 direct comparison to closely related free-living sister taxa is not possible, and there are no  
52 known free-living apicomplexans (Janouskovec and Keeling 2016). However genomic data  
53 is available from the photosynthetic Chromerids (Woo et al. 2015), which likely diverged  
54 from apicomplexans 600-800 million years ago (Votýpka et al. 2016).

55         Despite the high pathogenicity and parasitic adaptations of many members,  
56 questions have emerged over whether Apicomplexa is an entirely parasitic group. Though  
57 this sentiment has long been mentioned in publications (Morrison 2009; Roos 2005;  
58 Mathur et al. 2018; Gubbels and Duraisingh 2012; McFadden and Yeh 2017; Woo et al.  
59 2015, Votýpka et al. 2016), the current evidence suggests that the interactions between  
60 apicomplexans and their hosts are far more varied than previously recognized. In fact, it is  
61 likely that apicomplexans span the full spectrum from parasitism to commensalism, and  
62 even mutualism (Rueckert, Betts, and Tsaousis 2019; Kwong et al. 2019; Saffo et al. 2010).  
63 However, what defines the boundaries along this continuum of symbiotic association is still  
64 a topic of much debate (Leung and Poulin 2008; Johnson and Oelmüller 2009; Ewald 1987).  
65 Phylogenetic analysis indicates *Nephromyces* is sister to the haematozoan clade, and closely  
66 related to highly virulent genera such as *Plasmodium*, *Theiliera*, and *Babesia* (Muñoz-Gómez  
67 et al. 2019). Thus far, apicomplexan species with variable life strategies have been found in  
68 early branching groups, such as the Gregarina and Coralllicods. However, the existence of  
69 this reportedly mutualistic taxon deep within Apicomplexa, sister to a group of highly

70 virulent blood parasites, suggests the unique biology of Nephromycidae might be  
71 responsible for such a shift to a commensal or mutualistic life strategy.

72 *Cardiosporidium cionae* was originally described in 1907 by Van Gaver and Stephan,  
73 who correctly identified it as a novel sporozoan parasite of the invasive tunicate *Ciona*  
74 *intestinalis*. This species wasn't mentioned again until it was observed by Scippa, Ciancio,  
75 and de Vincentiis in 2000, and then formally redescribed by Ciancio et al. in 2008, a full  
76 century after its initial discovery. Similar to other haemosporidians such as *Plasmodium*, *C.*  
77 *cionae* is found in the blood of its host. It localizes to the heart and pericardial body, a  
78 collection of sloughed off cells that accumulates over the life of the tunicate inside the  
79 pericardium (Evans Anderson and Christiaen, 2016). *Ciona intestinalis* is highly invasive;  
80 this prolific species has spread globally traveling in the hulls and bilgewater of ships and is  
81 now found on every continent except Antarctica. While *C. cionae* infection has only been  
82 formally confirmed in The Gulf of Naples, Italy (Ciancio et al. in 2008), and Narragansett  
83 Bay, Rhode Island, USA, it likely has a broad range as well. Additionally, TEM data from the  
84 redescription of *C. cionae* revealed a bacterial endosymbiont (Ciancio et al. 2008).

85 The closest relative of *C. cionae*, *Nephromyces*, was first described around the same  
86 time in 1888, though its unusual filamentous morphology caused it to be misclassified as a  
87 chytrid fungus until 2010 (Saffo et al. 2010). *Nephromyces* is found in the Molgulidae family  
88 of tunicates, in a ductless structure of unknown function adjacent to the heart, known as  
89 the renal sac. It is thought to be mutualistic due to a near 100% infection prevalence (Saffo  
90 et al. 2010) and is capable of utilizing the waste products that the host tunicate sequesters  
91 in the renal sac as a source of glycine, pyruvate, and malate (Paight et. al 2019).

92 *Nephromyces* also houses separate three lineages of bacterial endosymbionts (Paight et al.

93 2020). Though endosymbiotic associations are commonly found in other protists such as  
94 ciliates, diatoms, and amoebas, bacterial endosymbiosis in Apicomplexa is unique to this  
95 lineage (Nowack and Melkonian 2010), which only includes *Cardiosporidium* and  
96 *Nephromyces* (Muñoz-Gómez et al. 2019).

97       Endosymbiotic bacteria allow eukaryotes to exploit an enormous range of  
98 environments they would otherwise be unable to inhabit. Endosymbionts span a wide  
99 variety of taxa, from the *Buchnera* endosymbionts of aphids, which provide essential  
100 vitamins and amino acids, to the chemotrophic bacteria at the base of the deep-sea  
101 hydrothermal vent food chain. The diversity of prokaryotic metabolic pathways  
102 (McCutcheon, Boyd, and Dale 2019) drives the propensity of bacteria to colonize and  
103 exploit unusual habitats, including such extreme environments as radioactive waste  
104 (Fredrickson et al. 2004), highly acidic hot springs (Marciano-Cabral 1988), or even the  
105 inside of a host. In multicellular hosts, bacterial endosymbionts are frequently sequestered  
106 to specific structures or tissues, but in protists they must reside directly in the cytoplasm,  
107 making these associations far more intimate (Nowack and Melkonian 2010).

108       Though these interactions appear beneficial, endosymbiosis is rooted in conflict  
109 (Keeling and McCutcheon 2017; McCutcheon, Boyd, and Dale 2019). Many of the common  
110 endosymbiotic taxa, such as those within the order *Rickettsiales*, are closely related to  
111 pathogens. *Rickettsiales* is likely the sister taxon to the modern eukaryotic mitochondria  
112 (Fitzpatrick, Creevey, and McInerney 2006), and also contains *Wolbachia*, a genus of  
113 arthropod and nematode endosymbionts known to infect 25-70% of insects (Kozek and  
114 Rao 2007). Endosymbiosis and pathogenesis are closely related due to host cell invasion  
115 and persistence mechanisms (Keeling and McCutcheon 2017). However, the invading

116 bacteria rarely see long term benefits from these interactions. Endosymbiont genomes are  
117 frequently found to be highly reduced due to the impact of Muller's ratchet, in which  
118 population bottlenecks in vertically transmitted endosymbionts cause an accumulation of  
119 deleterious mutations over time (Moran 1996; McCutcheon and Moran 2012; Nowack and  
120 Melkonian 2010). With no gene flow between populations, endosymbionts are unable to  
121 recover from mutations and replication errors, which are more likely to occur in G/C rich  
122 regions, resulting in a characteristic A/T bias (McCutcheon, Boyd, and Dale 2019). The net  
123 impact of these forces is the creation of highly reduced, A/T rich genomes, which have  
124 convergently evolved in the majority of vertically transmitted endosymbiont lineages  
125 (Moran 1996; McCutcheon and Moran 2012; Keeling and McCutcheon 2017; McCutcheon,  
126 Boyd, and Dale 2019; Nowack and Melkonian 2010). Though the endosymbiont is fed and  
127 housed, it is also effectively incapacitated and permanently tied to its host.

128         Housing an endosymbiont is also costly for the host, and maintaining a foreign cell,  
129 rather than digesting or expelling it, indicates the endosymbiont confers a significant  
130 advantage. As part of a larger investigation of the Nephromycidae, here we focus on  
131 characterizing the role of the bacterial endosymbionts reported from *C. cionae* (Ciancio et  
132 al. 2008). Since *Cardiosporidium* and *Nephromyces* have maintained  $\alpha$ -proteobacteria  
133 endosymbionts since before they diverged, we hypothesize this lineage of endosymbiont  
134 must provide metabolic functions of high value to its host apicomplexans. The maintenance  
135 of bacterial endosymbionts could be reducing host dependency and resource competition  
136 by providing novel biosynthetic pathways, thereby reducing virulence in this unique  
137 lineage.

138  
139 **Materials and Methods**

140 Microscopy

141 Visual screens of *Ciona intestinalis* hemolymph were conducted using a 5%  
142 Giemsa/phosphate buffer stain with a thin smear slide preparation, as is commonly used to  
143 identify malarial infections (Moll et al. 2008). The filamentous life stage was identified  
144 during these screens due to its morphological similarity to *Nephromyces*. To confirm  
145 identity, three samples comprising 10-15 of the cell types of interest were manually picked  
146 and washed using stretched Pasteur pipettes and phosphate buffered saline. These samples  
147 were extracted, PCR amplified with *C. cionae* specific primers, and the resulting PCR  
148 product sequenced on the Sanger platform at the University of Rhode Island Genome  
149 Sequencing Center.

150 Fluorescence *in situ* hybridization (FISH) with 16S rRNA class specific probes was  
151 used to localize the bacterial endosymbionts as shown in Fig.1 (panels e and i). The  
152 hybridization was conducted as described in Paight et al., 2020.

153

154 Extraction, Sequencing, Assembly, and Binning

155 The material for the *Cardiosporidium cionae* transcriptome was collected and  
156 isolated from wild *Ciona intestinalis* tunicates, as described in detail in Paight et al (2019).  
157 A sucrose density gradient was used to isolate *C. cionae* from tunicate hemolymph, and to  
158 enrich highly infected samples of hemolymph identified with microscopy. The gradient was  
159 composed of 20%, 25%, 30%, 35%, and 40% sucrose in phosphate buffer, loaded with  
160 approximately 5mL of hemolymph, and centrifuged in a swinging bucket rotor on 500 x g  
161 for 30 minutes, at 4°C (Paight et al. 2019). The 25% and 30% layers were then collected,  
162 pelleted, and washed with phosphate buffered saline, and stored at -80°C. RNA was



163 extracted from the pellets and the highly infected samples used the Zymo Quick-RNA kit  
164 (Zymo Research LLC, Irvine, CA). Three samples with unfiltered hemolymph, hemolymph  
165 enriched with the 25% layer, and hemolymph enriched with the 30% layer were shipped  
166 on dry ice to the University of Maryland, Baltimore Institute for Genome Sciences, and  
167 multiplexed on a single lane of an Illumina HiSeq. These samples produced 92,250,706,  
168 109,023,104, and 110,243,954 reads (Paight et al. 2019). They were assembled with  
169 Trinity/Trinotate v2.4.0 (Haas et al. 2014) and binned iteratively with OrthoFinder v2.3.3  
170 (Emms and Kelly 2019) using a custom database of tunicates, Alveolates, and bacterial  
171 endosymbiont data to remove contamination from the host and environment.

172         For genomic sequencing, *C. intestinalis* were collected from Snug Harbor in South  
173 Kingstown, Rhode Island (41°23'13.4"N, 71°31'01.5"W) in August and September 2018,  
174 following the same protocol for dissection and needle extraction of the tunicate  
175 hemolymph from the pericardial sac. The sucrose density gradient described above was  
176 also used isolate *C. cionae* infected cells for genomic DNA, except that, in 3 of the 4 samples  
177 used, a 27% sucrose layer was substituted for the 25% layer to better capture *C. cionae*  
178 infected cells. In the fourth sample, a 30% layer was used. The layer of interest was  
179 centrifuged, collected, pelleted, and washed as described above, and in Paight et al. (2019).  
180 Filtered samples were used alone, rather than being incorporated into unfiltered  
181 hemolymph samples. Genomic DNA was immediately extracted using a 1% SDS lysis buffer,  
182 Proteinase K and phenol-chloroform extraction, followed by an overnight ethanol  
183 precipitation at -20 °C. Samples were assessed for quality and concentration with gel  
184 electrophoresis, nanodrop, and Qubit (broad range), and then stored at -20 °C.

185 Samples from four separate gradient columns were individually prepared at the  
186 University of Rhode Island Genome Sequencing Center, and the resulting libraries run on a  
187 single lane of an Illumina HiSeq4000 at the University of Maryland, Baltimore Institute for  
188 Genome Sciences. These libraries were independently trimmed and assessed for quality  
189 using Trimmomatic v0.36 and FastQC v0.11.8 before being pooled and assembled with  
190 SPAdes v3.13.0 on the Brown University OSCAR server (Bolger, Lohse, and Usadel 2014;  
191 “FastQC A Quality Control Tool for High Throughput Sequence Data” n.d.; Bankevich et al.  
192 2012).

193 The SPAdes metagenomic assembly was binned by assigning taxonomy to contigs  
194 with CAT (von Meijenfeldt et al. 2019). *Rickettsiales* sequences were confirmed using  
195 MetaBAT (Kang et al. 2015), and the resulting contigs inspected for contamination and  
196 reassembled with Geneious v9.1.8 (“Geneious | Bioinformatics Software for Sequence Data  
197 Analysis” 2017). Additional apicomplexan sequences were identified by mapping trimmed  
198 and binned transcriptomic reads to the full metagenomic assembly using Bowtie2 v2.3.5.1,  
199 and contig coverage calculated with the bedtools v2.26.0 genomecov function (Langmead  
200 and Salzberg 2012; Quinlan and Hall 2010). The resulting file was sorted with R to extract  
201 contigs with greater than 50% coverage of *C. cionae* transcripts. Both the *C. cionae* and  $\alpha$ -  
202 proteobacterial endosymbiont genomic assemblies were trimmed to a minimum length of  
203 1kb, as contigs smaller than this were unlikely to be reliably binned. Genome assembly  
204 graphs were also visualized with Bandage v0.8.1 (Wick et al. 2015) and clusters of interest  
205 were identified with BLAST. The  $\alpha$ -proteobacteria cluster was identified with BLAST,  
206 exported, and compared to the CAT binned bacterial assembly with average nucleotide  
207 identity estimations (Rodriguez and Konstantinidis 2016).

208 Organellar assemblies for both the apicoplast and the mitochondrion were  
209 generated with NOVOPlasty v3.7.2 (Dierckxsens, Mardulyn, and Smits 2016). The seed  
210 sequences for these assemblies were located using the apicoplast genomes of *Nephromyces*  
211 (Muñoz-Gómez et al. 2019), and Sanger sequences of the *C. cionae* cytochrome C oxidase  
212 subunit one (COX-1) gene generated with PCR with local BLASTN databases (Madden  
213 2003).

#### 214 Gene Prediction and Annotation

215 Annotation of the  $\alpha$ - proteobacteria endosymbiont genome and *C. cionae*  
216 mitochondria was carried out using Prokka v1.14.5 (Seemann 2014). Closely related  
217 *Rickettsia* genomes (as indicated by the preliminary 16S phylogeny) were retrieved from  
218 NCBI and used to generate a custom database for  $\alpha$ - proteobacteria genome annotation  
219 (Seemann 2014) (Table S1). Annotation of the apicoplast was carried out in Geneious  
220 v9.1.8 using a custom database of *Nephromyces* apicoplast annotations (Muñoz-Gómez et  
221 al. 2019). Inverted repeat regions were identified with Repeat Finder plugin.

222 *Cardiosporidium cionae* genomic contigs were annotated with the MAKER v2.31.10  
223 pipeline (Holt and Yandell 2011). Repeats were soft masked using RepeatMasker v4.0.9  
224 (Smit, Hubley, and Green 2013). *Ab initio* predictions and species training parameters were  
225 generated with both WebAugustus (Hoff and Stanke 2013) and SNAP-generated hidden  
226 markov models (Korf 2004). This process was repeated iteratively, and the AED values  
227 indicating the fit of gene prediction to the model were analyzed to ensure high quality  
228 predictions. Predicted proteins from both organisms were functionally classified with the  
229 Kyoto Encyclopedia of Genes and Genomes (KEGG) and NCBI BLASTP v2.7.0+ (Kanehisa et  
230 al. 2017; Madden 2003). Coding sequences were searched for homologous domains with

231 InterProScan (Mitchell et al. 2019). Individual genes of interest were screened using BLAST  
232 databases.

233  
234 Analysis

235       Completeness of the *C. cionae* genome and transcriptome were assessed with BUSCO  
236 using the eukaryotic database (Simão et al. 2015). Homologs identified as multicopy by  
237 BUSCO were manually screened with NCBI-BLAST to confirm they did not represent  
238 contamination in the finished assembly. Proteins were annotated using orthologues from  
239 EuPathDB, PFAM, Kegg, and Interpro. Transcripts with multiple predicted isoforms in the  
240 transcriptome were filtered and selected based on completeness, Interpro score, and  
241 length. Completeness and contamination of the *C. cionae*  $\alpha$ - proteobacteria genome was  
242 assessed with the Microbial Genome Atlas (MiGA) and CheckM (Parks et al. 2015;  
243 Rodriguez-R et al. 2018). Candidate pseudogenes were located with Pseudofinder with  
244 default parameters, using a custom BLAST database of proteins from the 785 complete  
245 alphaproteobacterial genomes available on NCBI (Syberg-Olsen et al. 2018). Visual  
246 representations of the metabolic pathways were constructed for both *C. cionae* and the  $\alpha$ -  
247 proteobacteria using functional annotations from KEGG (Kanehisa et al. 2017). Visual  
248 representations of the  $\alpha$ - proteobacteria were generated using Circos (Krzywinski et al.  
249 2009) with annotation data from Prokka and functional annotations from KEGG.

250       In addition to functional comparisons using KEGG annotations, the  $\alpha$ -  
251 proteobacterial endosymbiont genome was also compared to the *Nephromyces*  
252 endosymbiont with similarity estimations and orthologous gene content. Similarity was  
253 compared with average nucleotide identity and average amino acid identity calculations  
254 using the web-based ANI and AAI calculator (Rodriguez and Konstantinidis 2016).

255 Orthologous gene content comparisons between the *C. cionae*  $\alpha$ -proteobacteria and all of  
256 the endosymbionts in the *Nephromyces* system was carried out with OrthoFinder v2.3.3  
257 (Emms and Kelly 2019). The resulting overlaps were calculated using the R package limma  
258 (Ritchie et al. 2015), and the final figure generated with Venn Diagram (Chen and Boutros  
259 2011), also in R. Functional gene overlap was based on KEGG annotations and generated  
260 using the same R packages.

261

## 262 Phylogenetics

263 Bacterial phylogenies were constructed using the predicted taxonomy from MiGA,  
264 which assigned the endosymbiont to the class alphaproteobacteria with a p value of 0.25  
265 (Parks et al. 2015; Rodriguez-R et al. 2018). To confirm this result, all complete bacterial  
266 proteome accessions belonging to this class were retrieved from the NCBI database (712 in  
267 total). These data were searched using the  $\alpha$ - proteobacteria HMM single copy gene set  
268 comprised of 117 proteins, aligned, and the tree constructed using the GToTree workflow  
269 (Lee 2019; “Accelerated Profile HMM Searches” n.d.; Hyatt et al. 2010; Price, Dehal, and  
270 Arkin 2010; Edgar 2004; “TaxonKit - NCBI Taxonomy Toolkit” n.d.; Capella-Gutiérrez, Silla-  
271 Martínez, and Gabaldón 2009).

272 The apicoplast encoded genes of *C. cionae* were added to the dataset used in  
273 (Muñoz-Gómez et al. 2019) to confirm monophyly with *Nephromyces*, previously indicated  
274 with COI and 18S gene trees. Protein homologs were identified using local BLAST-P  
275 searches and concatenated with the existing dataset. These sequences were aligned with  
276 MAFFT v7, trimmed in Geneious, and concatenated (Madden 2003; Katoh and Standley  
277 2013). Species phylogeny was inferred with Maximum Likelihood using IQ-TREE (v1.6) and

278 the LG+G model. Statistical support at branches was estimated using ultrafast bootstrap  
279 (1000) and aLRT (1000) (Nguyen et al. 2015).

## 280 Parameters

281 The specific scripts and settings used for bioinformatic analysis of *C. cionae* and its  
282 endosymbiont have been deposited in a publicly accessible [GitHub](#) repository  
283 ([github.com/liz-hunter/cardio\\_project](https://github.com/liz-hunter/cardio_project)).

284

285

## 286 **Results**

287

### 288 *Cardiosporidium cionae*

289 Genomic sequencing of the pooled *C. cionae* libraries yielded a total of 320,000,000  
290 paired reads. After trimming and assembly, this resulted in 656,251 contigs, 176,701 of  
291 which were larger than 1kb. Binning with CAT resulted in 3,641 contigs assigned to the  
292 superphylum Alveolata. Contigs assigned to Dinophyceae and Ciliophora were removed,  
293 leaving 2754 contigs, and 1790 of these contigs were larger than 1kb. The RNA-seq assisted  
294 coverage-based binning added an additional 935 contigs, 423 of which were unique and  
295 larger than 1kb. Further manual curation using OrthoFinder eliminated 7 additional  
296 contigs. This resulted in a total of 2,206 contigs assigned to *C. cionae*. Of the remaining  
297 174,496 contigs, 221 were assigned to the order Rickettsiales, and 147,793 contigs  
298 assigned to the class Ascidiacea (tunicate). The *C. cionae* genome assembly is 57Mb in total,  
299 with an N50 of 54.04kb, and a G/C content of 34.4% (Table 1). This is smaller than some  
300 apicomplexan genomes such as coccidian *Toxoplasma gondii* (80Mb), but considerably  
301 larger than haemosporidian *Plasmodium falciparum* (22.9Mb) and the highly reduced  
302 *Cryptosporidium parvum* (9Mb) (Sibley and Boothroyd 1992; Abrahamsen 2004). Gene

303 prediction resulted in 4,674 proteins (Table 1). The binned transcriptome assembly  
304 yielded a total of 15,077 proteins assigned to *C. cionae*, including all isoforms. When filtered  
305 to remove redundancy, this dataset was reduced to 6,733 unique proteins.

306         The final binned *C. cionae* genome assembly is estimated to be 63.7% complete by  
307 BUSCO, with 13.9% duplication. The transcriptome is slightly more complete, with a BUSCO  
308 estimate of 68.3% complete orthologs, and 12.5% partial (Paight et al. 2019). When the  
309 isoforms were filtered for annotation, this completeness value dropped slightly to 60.0%  
310 with 4.6% duplication (Table 1). Despite this, the *C. cionae* assembly contains genes from  
311 all of the expected core biosynthetic pathways for a haematozoan. *Cardiosporidium* has a  
312 suite of basic metabolic pathways including complete or nearly complete functional  
313 predictions for glycolysis, gluconeogenesis, pyruvate oxidation, the pentose phosphate  
314 cycle, and the citric acid cycle (Fig. 2, Table S2). It also encodes a handful of unexpected  
315 pathways, including the entire *de novo* IMP biosynthetic pathway. *Cardiosporidium* contains  
316 the genes for fatty acid biosynthesis and elongation in the endoplasmic reticulum, as well  
317 degradation to produce acetyl-CoA (Fig. 2, Table S2).

318         *Cardiosporidium* also encodes the majority of the pathway of triacylglycerol  
319 biosynthesis, and partial pathways for cholesterol and ketone body synthesis. It completely  
320 lacks any evidence of biosynthetic genes for eight of the twenty-one amino acids but does  
321 encode amino acid conversion pathways that other Hematozoa lack. These include the  
322 conversion of phenylalanine to tyrosine, and homocysteine to methionine (Fig. 2, Table S2).  
323 Additionally, *C. cionae* is able to generate serine from multiple sources (glycerate-3P and  
324 glycine), as well as degrade it to pyruvate. The genomic data we recovered only encodes  
325 partial pathways for riboflavin, and heme synthesis, and also lacks genes for biotin,

326 thiamine, ubiquinone, and cobalamin synthesis. However, we identified both C5 and C10-  
327 20 isoprenoid biosynthesis pathways. This genome also supports the presence of the  
328 purine degradation pathway previously identified in the transcriptome of *Nephromyces*  
329 (Paight et al. 2019).

330 Visual screens with thin-smear Giemsa staining indicate that *C. cionae* maintains a  
331 very low density inside its host. These microscopy screens further revealed the presence of  
332 a large, extracellular filamentous life stage analogous to the filamentous life-stage in  
333 *Nephromyces* (Fig. 1). Single cell isolation, extraction, and PCR confirmed these cell types  
334 were indeed a life-stage of *C. cionae*.

335 Phylogenetic analysis of the apicoplast encoded proteins supported the monophyly  
336 of *Nephromyces* and *C. cionae* (Fig. 3). This analysis differs with the placement results for  
337 *Nephromyces* published by Muñoz-Gómez et al. 2019, due to maximized data and the  
338 omission of early branching taxa. This taxon sampling caused Nephromycidae to branch  
339 outside of the Hematozoa. The *C. cionae* apicoplast is structurally very similar to those of  
340 *Nephromyces* in terms of gene content, size, and organization (Fig. S1).

#### 341 342 $\alpha$ -proteobacteria

343 Of the contigs assigned to Rickettsiales, 45 were larger than 1kb. Reassembly  
344 yielded 31 contigs, and manual curation resulted in a final 29 contigs. The final  $\alpha$ -  
345 endosymbiont assembly is 1.05Mb in total, with an N50 of 250.39kb, and a G/C content of  
346 29.1%. Gene prediction and annotation resulted in 906 proteins (Table 1). The Bandage  
347 cluster was shown to have an average nucleotide identity (two-way ANI) of 99.95% (SD  
348 .81%) based on 4,878 fragments when compared with the CAT binned assembly. This  
349 provided independent validation for the bacterial genome assembly binning. The  $\alpha$ -



350 endosymbiont assembly is estimated to be 91.9% complete with 1.8% contamination by  
351 MiGA, and 95.5% complete with 2.1% contamination by CheckM.

352 Characteristic of bacterial endosymbionts, it has a low G/C content and high coding  
353 density (Fig. 4). This organism is predicted to encode just 906 genes by Prokka (Table 1),  
354 and 37 of which were identified as candidate pseudogenes by Pseudofinder. These genes  
355 were largely hypothetical proteins, but 15 genes were also identified as likely being  
356 nonfunctional. These included a permease, transposase, thioesterase, phosphodiesterase,  
357 and multiple transferases. Pseudofinder also joined 13 ORFs, leaving only 865 predicted  
358 functional genes. With so few functional genes, it is not surprising that this  $\alpha$ -  
359 proteobacteria has a sparse number of complete metabolic pathways (Fig. 4, Fig. 2). The  
360 genome is slightly smaller than closely related alphaproteobacterial endosymbionts, such  
361 as *Candidatus Phycorickettsia trachydisci* sp. nov. (1.4MB), *Orientia tsutsugamushi* (2MB),  
362 and other protist associated Rickettsiales lineages (1.4-1.7MB) (Yurchenko et al. 2018;  
363 Nakayamak et al. 2010; Muñoz-Gómez et al. 2019). The  $\alpha$ - proteobacteria genomes in both  
364 *C. cionae* and *Nephromyces* encode pathways for the biosynthesis of fatty acids,  
365 pyrimidines, lipoic acid, heme, glutamine, lysine, ubiquinone, and the citric acid cycle. Only  
366 the *C. cionae*  $\alpha$ - proteobacteria maintains the genes for asparagine biosynthesis, glycolysis,  
367 and the pentose phosphate pathway (Fig. S2), while only the *Nephromyces*  $\alpha$ -  
368 proteobacteria can complete glutamic acid biosynthesis.

369 When the  $\alpha$ - proteobacteria in both *Cardiosporidium* and *Nephromyces* were  
370 compared for similarity, the results showed these taxa were too divergent to be compared  
371 with average nucleotide identity (ANI), and they were instead compared with average  
372 amino acid identity (AAI). A two-way AAI analysis of 656 proteins showed 47.61%

373 (SD:12.51%) similarity between these genomes, which is consistent with the phylogenetic  
374 analysis that indicates considerable evolutionary distance between these two taxa. This  
375 multigene phylogeny of the  $\alpha$ -endosymbionts is congruent with the preliminary 16S gene  
376 trees, which places these species in the order Rickettsiales. They belong to the family  
377 Rickettsiaceae and are sister to the genus *Rickettsia* (Fig. 5).

378 Ortholog comparisons between the  $\alpha$ -endosymbionts indicate these taxa share the  
379 majority of their core functions, but the *Cardiosporidium* system  $\alpha$ -endosymbiont  
380 maintains more unique genes. This taxon also shares greater ortholog and functional  
381 overlap with the two additional endosymbionts present in the *Nephromyces* system:  
382 betaproteobacteria and Bacteroides (Fig. S2).

### 383 Data Availability

384 All data associated with this project is deposited in GenBank under the BioProject  
385 PRJNA664590. The *Cardiosporidium cionae* whole genome shotgun projected has been  
386 deposited under the accession JADAQX000000000, and the alphaproteobacterial  
387 endosymbiont genome is deposited under the accession JADAQY000000000, and the  
388 transcriptome is deposited under the accession GIVE000000000. The versions described in  
389 this paper are versions JADAQX010000000, JADAQY010000000, and GIVE010000000.

390

### 391 **Discussion**

392 Metabolically, *C. cionae* is similar to other sequenced hematozoans. However, it also  
393 encodes some unusual pathways. *Cardiosporidium cionae*, like *Nephromyces*, encodes the *de*  
394 *novo* purine biosynthesis pathway (Fig. 2, Table S2), which has been lost in all other  
395 sequenced apicomplexans (Janouskovec and Keeling 2016). These genes resolve with

396 *Nephromyces*, *Vitrella brassicaformis* and dinoflagellates such as *Cryptothecodinium cohnii* in  
397 phylogenetic analysis, demonstrating this was not a recent horizontal gene transfer event  
398 (Paight et al., 2020). Instead, these data indicate that both genera within Nephromycidae  
399 have maintained the ancestral pathway found in free-living Chromerids, and the genes for  
400 purine biosynthesis have been lost independently in all other apicomplexan lineages. *De*  
401 *novo* biosynthesis of purines in *C. cionae* and *Nephromyces* reduces dependence on  
402 preformed purine metabolites from their respective hosts, potentially enabling the  
403 persistence of the extracellular life stages in both of these lineages. *Nephromyces* and *C.*  
404 *cionae* are also able to degrade purines (Paight et al. 2019), and we suspect this aspect of  
405 their metabolism is related to the physiology of tunicates, which are incapable of  
406 metabolizing uric acid, a purine waste product. Even though the tunicate hosts are unable  
407 to degrade uric acid, they inexplicably accumulate it (Nolfi 1970; Lambert et al. 1998).

408         Whereas the complete pathways for pentose phosphate cycle, citric acid cycle, and  
409 gluconeogenesis mirror other hematozoans (Fig. 2, Table S2), *C. cionae* also encodes a  
410 handful of genes that suggest it is able to produce glyoxylate. Paight et al. (2019) reported  
411 transcripts for a number of peroxisomal proteins in both *C. cionae* and *Nephromyces*, and  
412 predicted a novel metabolic pathway. Despite their numerous metabolic similarities, *C.*  
413 *cionae* and *Nephromyces* appear to have distinct pathways for central carbon metabolism  
414 (specifically the citric acid cycle), and part of the closely linked glyoxylate cycle. Both  
415 *Nephromyces* and *C. cionae* possess a uniformly highly expressed purine degradation cycle  
416 that converts ureidoglycolate to glyoxylate using a novel amidohydrolase, and generate  
417 glycine and serine. However, only *Nephromyces* can feed glyoxylate back into the citric acid  
418 cycle using malate synthase (Paight et al. 2019). This pathway is a product of the unusual

419 renal sac environment where *Nephromyces* makes its home, which contains an abundance  
420 of uric acid sequestered by the host tunicate. In *C. cionae*, malate synthase is conspicuously  
421 absent in both the genome and transcriptome, indicating the carbon cycling in these closely  
422 related organisms is likely distinct, and potentially one of the differences that accounts for  
423 the virulence disparity between *C. cionae* and *Nephromyces*. However, the list of  
424 differences, which also includes host species and organellar localization, is relatively short.  
425 Though it was known that these taxa have similar life history traits (Ciancio et al. 2008;  
426 Saffo et al. 2010), these genomic data suggest their morphology and metabolism are also  
427 remarkably similar.

428 *Cardiosporidium cionae* and *Nephromyces* (Nephromycidae) branch within  
429 Haematozoa, a group of obligate, parasitic, intracellular apicomplexans (Muñoz-Gómez et  
430 al. 2019; Mathur et al. 2019). All previously described members of Haematozoa, and sister  
431 taxon Coccidia, are intracellular and obligately parasitic. Despite their phylogenetic  
432 position within an obligately intracellular clade, members of the Nephromycidae have  
433 large, filamentous, extracellular life stages (Fig. 1). *Nephromyces* is completely extracellular  
434 (Saffo and Nelson 1982), while *C. cionae* has both intracellular and extracellular life stages.  
435 Though morphologically similar to the more basal gregarine apicomplexans (Rueckert et al.  
436 2015), these groups are phylogenetically distant. The Nephromycidae have evolved from  
437 intracellular ancestors, and has transitioned to the extracellular environment. In  
438 *Nephromyces*, this transition is complete, whereas *C. cionae* has both intracellular and  
439 extracellular life stages. We believe that extracellularity in this group is related to another  
440 unusual characteristic: the maintenance of bacterial endosymbionts in both *C. cionae* and  
441 *Nephromyces*.

442           The maintenance of monophyletic  $\alpha$ -endosymbionts in both the *C. cionae* and  
443 *Nephromyces* lineages indicates that this endosymbiont is providing something vital to the  
444 system. However, at first glance, these endosymbionts are contributing very little to their  
445 host apicomplexans. Like its counterpart in *Nephromyces*, the *C. cionae*  $\alpha$ -endosymbiont  
446 contains only a handful of biosynthetic pathways (Fig. 4). Overall, the  $\alpha$ -endosymbiont in *C.*  
447 *cionae* does contain more unique orthologs and functional genes when compared with its  
448 counterpart in the *Nephromyces* system (Fig. S2). Primarily, these unique genes are related  
449 to energy metabolism (Fig. 4, Fig. S2), and their presence is likely a result of the heightened  
450 evolutionary pressure to maintain critical genes in a system with a single endosymbiont,  
451 compared to the three types of endosymbionts present in *Nephromyces* communities. The  
452  $\alpha$ -endosymbiont encoded pathways for energy and carbon cycling, while possibly  
453 advantageous to *C. cionae*, are likely not critical contributions because they can be  
454 completed by the apicomplexan, independent of the endosymbiont. The maintenance of an  
455 endosymbiont is costly, and it is unlikely to be preserved for a redundant function  
456 (McCutcheon and Moran, 2012).

457           A handful of pathways have been maintained in both  $\alpha$ -endosymbiont lineages, and  
458 are also absent in the host apicomplexans. The only apparently critical functions that  
459 cannot be replaced by the apicomplexan metabolism are lysine biosynthesis, and lipoic acid  
460 biosynthesis. Lysine is an essential amino acid, and plays an important role in protein  
461 biosynthesis. Lysine is an essential media component for the growth of *P. falciparum* and is  
462 predicted to be scavenged from the host by *T. gondii* (Tymoshenko et al. 2015; Schuster  
463 2002). Lysine biosynthesis is also absent in the *Nephromyces* genome and transcriptome  
464 (Paight et al., 2020). Like *Nephromyces*, *T. gondii* and *P. falciparum*, our data indicate *C.*

465 *cionae* cannot synthesize its own lysine and is dependent on host scavenging. Though we  
466 cannot exclude the possibility that *C. cionae* encodes lysine biosynthesis with an incomplete  
467 genome, based on the genomes of other apicomplexans, lysine is likely absent within  
468 Nephromycidae. Lysine is also essential for the host tunicate, *Ciona intestinalis* (Kanehisa et  
469 al. 2017), and both organisms requiring environmental sources of lysine puts them in  
470 constant competition for the resource. *Cardiosporidium cionae* appears to have  
471 circumvented this conflict by maintaining a bacterial endosymbiont that contains the  
472 pathway for *de novo* lysine biosynthesis. Rather than compete with the host tunicate for  
473 lysine, *C. cionae* cultivates an intracellular source for the essential amino acid, reducing  
474 host dependency and potentially virulence.

475         Lipoic acid is an aromatic sulfur compound that is an essential cofactor for a series  
476 of vital metabolic functions. These include the citric acid cycle and alpha keto  
477 dehydrogenase complexes, such as the pyruvate dehydrogenase complex and the glycine  
478 conversion system. In eukaryotes, lipoic acid is exclusively localized to the mitochondria  
479 and the plastid. Apicomplexans localize lipoic acid biosynthesis to the apicoplast, having  
480 lost the mitochondrial pathway after the acquisition of the plastid (Crawford et al. 2006).  
481 Instead, an alternative scavenging pathway is used to produce the lipoic acid required for  
482 the citric acid cycle and glycine conversion system in the mitochondria, and both the  
483 scavenging and biosynthetic pathways are considered essential (Günther et al. 2005).  
484 Functional studies have shown that when the lipoic acid biosynthetic pathways are  
485 knocked out, *P. falciparum* will compensate by scavenging more lipoic acid from the host  
486 and shuttling it to the apicoplast (Günther et al. 2007). Similarly, *T. gondii* growth is  
487 inhibited by lipoate-deficient media, suggesting scavenging is essential (Crawford et al.

488 2006). Metabolic modeling also indicates that even apicomplexans that maintain this  
489 pathway require supplemental lipoic acid from their host organisms (Blume and Seeber  
490 2018). Though lipoic acid is produced by the host tunicates, we speculate that there is  
491 limited availability for an extracellular organism because it is both produced and used in  
492 the mitochondria. This likely means *C. cionae* is dependent on this  $\alpha$ -endosymbiont for the  
493 production of key compounds such as lipoic acid, for the persistence of a stable  
494 extracellular life stage. In this way, maintaining the  $\alpha$ -endosymbiont as an internal cofactor  
495 source further reduces resource competition between *C. cionae* and its host.

496         The Nephromycidae have evolved from a clade of an obligately parasitic  
497 intracellular apicomplexans, and have transitioned to a mostly extracellular lifestyle. We  
498 hypothesize that, by obtaining bacterial endosymbionts, these apicomplexans have  
499 acquired metabolic capabilities that enabled this transition. Though *Nephromyces* shares an  
500  $\alpha$ -endosymbiont lineage with *C. cionae* (Fig. 5), it also has betaproteobacteria and  
501 Bacteroides endosymbionts. With this bacterial taxonomic diversity comes metabolic  
502 diversity, and though the  $\alpha$ -endosymbiont in *C. cionae* has more unique functional proteins  
503 and orthologs than its counterpart, this is dwarfed by the number of unique proteins and  
504 orthologs contributed by the two additional taxa present in the *Nephromyces* system (Fig.  
505 S2). We believe the sole endosymbiont in *C. cionae* provides a dedicated source of the  
506 essential metabolites lysine and lipoic acid, which likely reduces competition with its host  
507 compared to its haematozoan relatives, and makes extracellular life stages possible. In this  
508 way, *Cardiosporidium cionae* represents a potential intermediate in the transition to  
509 mutualism, that has been described in *Nephromyces* (Saffo et al. 2010).

## BIBLIOGRAPHY

- Abrahamsen, Mitchell S, Thomas J Templeton, Shinichiro Enomoto, Juan E Abrahante, Guan Zhu, Cheryl A Lancto, Mingqi Deng, et al. 2004. "Complete Genome Sequence of the Apicomplexan *Cryptosporidium Parvum*" 304: 6. "Accelerated Profile HMM Searches." n.d. Accessed February 7, 2020. <https://journals.plos.org/ploscompbiol/article?id=10.1371/journal.pcbi.1002195>.
- Alarcón, M. E., A. Jara-F, R. C. Briones, A. K. Dubey, and C. H. Slamovits. 2017. "Gregarine Infection Accelerates Larval Development of the Cat Flea *Ctenocephalides Felis* (Bouché)." *Parasitology* 144 (4): 419–25. <https://doi.org/10.1017/S0031182016002122>.
- "Babraham Bioinformatics - FastQC A Quality Control Tool for High Throughput Sequence Data." n.d. Accessed November 30, 2019. <http://www.bioinformatics.babraham.ac.uk/projects/fastqc/>.
- Bankevich, Anton, Sergey Nurk, Dmitry Antipov, Alexey A. Gurevich, Mikhail Dvorkin, Alexander S. Kulikov, Valery M. Lesin, et al. 2012. "SPAdes: A New Genome Assembly Algorithm and Its Applications to Single-Cell Sequencing." *Journal of Computational Biology* 19 (5): 455–77. <https://doi.org/10.1089/cmb.2012.0021>.
- Bolger, Anthony M., Marc Lohse, and Bjoern Usadel. 2014. "Trimmomatic: A Flexible Trimmer for Illumina Sequence Data." *Bioinformatics* 30 (15): 2114–20. <https://doi.org/10.1093/bioinformatics/btu170>.
- Capella-Gutiérrez, Salvador, José M. Silla-Martínez, and Toni Gabaldón. 2009. "TrimAl: A Tool for Automated Alignment Trimming in Large-Scale Phylogenetic Analyses." *Bioinformatics* 25 (15): 1972–73. <https://doi.org/10.1093/bioinformatics/btp348>.
- Center for Disease Control. 2019. "Impact of Malaria." January 29, 2019. [https://www.cdc.gov/malaria/malaria\\_worldwide/impact.html](https://www.cdc.gov/malaria/malaria_worldwide/impact.html).
- Chen, Hanbo, and Paul C. Boutros. 2011. "VennDiagram: A Package for the Generation of Highly-Customizable Venn and Euler Diagrams in R." *BMC Bioinformatics* 12 (1): 35. <https://doi.org/10.1186/1471-2105-12-35>.
- Ciancio, A., S. Scippa, M. Finetti-Sialer, A. De Candia, B. Avallone, and M. De Vincentiis. 2008. "Redescription of *Cardiosporidium Cionae* (Van Gaver and Stephan, 1907) (Apicomplexa: Piroplasmida), a Plasmodial Parasite of Ascidian Haemocytes." *European Journal of Protistology* 44 (3): 181–96. <https://doi.org/10.1016/j.ejop.2007.11.005>.
- Conrad, P.A., M.A. Miller, C. Kreuder, E.R. James, J. Mazet, H. Dabritz, D.A. Jessup, Frances Gulland, and M.E. Grigg. 2005. "Transmission of *Toxoplasma*: Clues from the Study of Sea Otters as Sentinels of *Toxoplasma Gondii* Flow into the Marine Environment." *International Journal for Parasitology* 35 (11–12): 1155–68. <https://doi.org/10.1016/j.ijpara.2005.07.002>.
- Crawford, Michael J, Nadine Thomsen-Zieger, Manisha Ray, Joachim Schachtner, David S Roos, and Frank Seeber. 2006. "*Toxoplasma Gondii* Scavenges Host-Derived Lipoic Acid despite Its de Novo Synthesis in the Apicoplast." *The EMBO Journal* 25 (13): 3214–22. <https://doi.org/10.1038/sj.emboj.7601189>.
- Criado-Fornelio, A., C. Verdú-Expósito, T. Martín-Pérez, I. Heredero-Bermejo, J. Pérez-Serrano, L. Guàrdia-Valle, and M. Panisello-Panisello. 2017. "A Survey for Gregarines (Protozoa: Apicomplexa) in Arthropods in Spain." *Parasitology Research* 116 (1): 99–110. <https://doi.org/10.1007/s00436-016-5266-0>.
- Dierckxsens, Nicolas, Patrick Mardulyn, and Guillaume Smits. 2016. "NOVOPlasty: De Novo Assembly of Organelle Genomes from Whole Genome Data." *Nucleic Acids Research*, October. <https://doi.org/10.1093/nar/gkw955>.
- Dyson, J., J. Grahame, and P.J. Evennett. 1993. "The Mucron of the Gregarine *Digyalum Oweni* (Protozoa: Apicomplexa), Parasitic in *Littorina* Species (Mollusca: Gastropoda)." *Journal of Natural History* 27 (3): 557–64. <https://doi.org/10.1080/00222939300770311>.
- Edgar, Robert C. 2004. "MUSCLE: Multiple Sequence Alignment with High Accuracy and High Throughput." *Nucleic Acids Research* 32 (5): 1792–97. <https://doi.org/10.1093/nar/gkh340>.
- Emms, David M., and Steven Kelly. 2019. "OrthoFinder: Phylogenetic Orthology Inference for Comparative Genomics." *Genome Biology* 20 (1): 238. <https://doi.org/10.1186/s13059-019-1832-y>.
- Evans Anderson, Heather, and Lionel Christiaan. 2016. "Ciona as a Simple Chordate Model for Heart Development and Regeneration." *Journal of Cardiovascular Development and Disease* 3 (3): 25. <https://doi.org/10.3390/jcdd3030025>.
- Fitzpatrick, David A., Christopher J. Creevey, and James O. McInerney. 2006. "Genome Phylogenies Indicate a Meaningful  $\alpha$ -Proteobacterial Phylogeny and Support a Grouping of the Mitochondria with the Rickettsiales." *Molecular Biology and Evolution* 23 (1): 74–85. <https://doi.org/10.1093/molbev/msj009>.



- Fredrickson, James K., John M. Zachara, David L. Balkwill, David Kennedy, Shu-mei W. Li, Heather M. Kostandarithes, Michael J. Daly, Margaret F. Romine, and Fred J. Brockman. 2004. "Geomicrobiology of High-Level Nuclear Waste-Contaminated Vadose Sediments at the Hanford Site, Washington State." *Applied and Environmental Microbiology* 70 (7): 4230–41. <https://doi.org/10.1128/AEM.70.7.4230-4241.2004>.
- Frénal, Karine, Jean-François Dubremetz, Maryse Lebrun, and Dominique Soldati-Favre. 2017. "Gliding Motility Powers Invasion and Egress in Apicomplexa." *Nature Reviews Microbiology* 15 (11): 645–60. <https://doi.org/10.1038/nrmicro.2017.86>.
- "Geneious | Bioinformatics Software for Sequence Data Analysis." 2017. Geneious. 2017. <https://www.geneious.com/>.
- Gubbels, Marc-Jan, and Manoj T. Duraisingh. 2012. "Evolution of Apicomplexan Secretory Organelles." *International Journal for Parasitology* 42 (12): 1071–81. <https://doi.org/10.1016/j.ijpara.2012.09.009>.
- Günther, Svenja, Lynsey Wallace, Eva-Maria Patzewitz, Paul J. McMillan, Janet Storm, Carsten Wrenger, Ryan Bissett, Terry K. Smith, and Sylke Müller. 2007. "Apicoplast Lipic Acid Protein Ligase B Is Not Essential for Plasmodium Falciparum." *PLoS Pathogens* 3 (12): e189. <https://doi.org/10.1371/journal.ppat.0030189>.
- Haas, Brian J, Alexie Papanicolaou, Moran Yassour, Manfred Grabherr, Philip D Blood, Joshua Bowden, Matthew Brian Couger, et al. 2013. "De Novo Transcript Sequence Reconstruction from RNA-Seq Using the Trinity Platform for Reference Generation and Analysis." *Nature Protocols* 8 (8): 1494–1512. <https://doi.org/10.1038/nprot.2013.084>.
- Hoff, Katharina J., and Mario Stanke. 2013. "WebAUGUSTUS—a Web Service for Training AUGUSTUS and Predicting Genes in Eukaryotes." *Nucleic Acids Research* 41 (Web Server issue): W123–28. <https://doi.org/10.1093/nar/gkt418>.
- Holt, Carson, and Mark Yandell. 2011. "MAKER2: An Annotation Pipeline and Genome-Database Management Tool for Second-Generation Genome Projects." *BMC Bioinformatics* 12 (1): 491. <https://doi.org/10.1186/1471-2105-12-491>.
- Hyatt, Doug, Gwo-Liang Chen, Philip F LoCascio, Miriam L Land, Frank W Larimer, and Loren J Hauser. 2010. "Prodigal: Prokaryotic Gene Recognition and Translation Initiation Site Identification." *BMC Bioinformatics* 11 (1). <https://doi.org/10.1186/1471-2105-11-119>.
- Janouskovec, Jan, and Patrick J. Keeling. 2016. "Evolution: Causality and the Origin of Parasitism." *Current Biology* 26 (4): R174–77. <https://doi.org/10.1016/j.cub.2015.12.057>.
- Jeurissen, S. H. M., E. M. Janse, A. N. Vermeulen, and L. Vervelde. 1996. "Eimeria Tenella Infections in Chickens: Aspects of Host-Parasite: Interaction." *Veterinary Immunology and Immunopathology*, Proceedings of the International Veterinary Immunology Symposium, 54 (1): 231–38. [https://doi.org/10.1016/S0165-2427\(96\)05689-9](https://doi.org/10.1016/S0165-2427(96)05689-9).
- Kanehisa, Minoru, Miho Furumichi, Mao Tanabe, Yoko Sato, and Kanae Morishima. 2017. "KEGG: New Perspectives on Genomes, Pathways, Diseases and Drugs." *Nucleic Acids Research* 45 (D1): D353–61. <https://doi.org/10.1093/nar/gkw1092>.
- Kang, Dongwan D., Jeff Froula, Rob Egan, and Zhong Wang. 2015. "MetaBAT, an Efficient Tool for Accurately Reconstructing Single Genomes from Complex Microbial Communities." *PeerJ* 3 (August): e1165. <https://doi.org/10.7717/peerj.1165>.
- Katoh, K., and D. M. Standley. 2013. "MAFFT Multiple Sequence Alignment Software Version 7: Improvements in Performance and Usability." *Molecular Biology and Evolution* 30 (4): 772–80. <https://doi.org/10.1093/molbev/mst010>.
- Keeling, Patrick J., and John P. McCutcheon. 2017. "Endosymbiosis: The Feeling Is Not Mutual." *Journal of Theoretical Biology* 434 (December): 75–79. <https://doi.org/10.1016/j.jtbi.2017.06.008>.
- Korf, Ian. 2004. "Gene Finding in Novel Genomes." *BMC Bioinformatics*, 9.
- Kozek, Wieslaw J., and Ramakrishna U. Rao. 2007. "The Discovery of Wolbachia in Arthropods and Nematodes – A Historical Perspective." *Wolbachia: A Bug's Life in Another Bug* 5: 1–14. <https://doi.org/10.1159/000104228>.
- Kwong, Waldan K., Javier del Campo, Varsha Mathur, Mark J. A. Vermeij, and Patrick J. Keeling. 2019. "A Widespread Coral-Infecting Apicomplexan with Chlorophyll Biosynthesis Genes." *Nature* 568 (7750): 103–7. <https://doi.org/10.1038/s41586-019-1072-z>.
- Lambert, Charles C, Gretchen Lambert, Guy Crundwell, and Katherine Kantardjieff. 1998. "Uric Acid Accumulation in the Solitary Ascidian," 10.
- Langmead, Ben, and Steven L Salzberg. 2012. "Fast Gapped-Read Alignment with Bowtie 2." *Nature Methods* 9 (4): 357–59. <https://doi.org/10.1038/nmeth.1923>.
- Lee, Michael D. 2019. "GToTree: A User-Friendly Workflow for Phylogenomics." Edited by Yann Ponty. *Bioinformatics* 35 (20): 4162–64. <https://doi.org/10.1093/bioinformatics/btz188>.

- Madden, Tom. 2003. *The BLAST Sequence Analysis Tool*. National Center for Biotechnology Information (US). <https://www.ncbi.nlm.nih.gov/books/NBK21097/>.
- Marciano-Cabral, F. 1988. "Biology of Naegleria Spp." *Microbiological Reviews* 52 (1): 114–33.
- Mathur, Varsha, Javier del Campo, Martin Kolisko, and Patrick J. Keeling. 2018. "Global Diversity and Distribution of Close Relatives of Apicomplexan Parasites." *Environmental Microbiology* 20 (8): 2824–33. <https://doi.org/10.1111/1462-2920.14134>.
- Mathur, Varsha, Martin Kolisko, Elisabeth Hehenberger, Nicholas A. T. Irwin, Brian S. Leander, Árni Kristmundsson, Mark A. Freeman, and Patrick J. Keeling. 2019. "Multiple Independent Origins of Apicomplexan-Like Parasites." *Current Biology* 29 (17): 2936–2941.e5. <https://doi.org/10.1016/j.cub.2019.07.019>.
- McCutcheon, John P., Bret M. Boyd, and Colin Dale. 2019. "The Life of an Insect Endosymbiont from the Cradle to the Grave." *Current Biology* 29 (11): R485–95. <https://doi.org/10.1016/j.cub.2019.03.032>.
- McCutcheon, John P., and Nancy A. Moran. 2012. "Extreme Genome Reduction in Symbiotic Bacteria." *Nature Reviews Microbiology* 10 (1): 13–26. <https://doi.org/10.1038/nrmicro2670>.
- McFadden, Geoffrey I., and Ross F. Waller. 1997. "Plastids in Parasites of Humans." *BioEssays* 19 (11): 1033–40. <https://doi.org/10.1002/bies.950191114>.
- McFadden, Geoffrey Ian, and Ellen Yeh. 2017. "The Apicoplast: Now You See It, Now You Don't." *International Journal for Parasitology* 47 (2–3): 137–44. <https://doi.org/10.1016/j.ijpara.2016.08.005>.
- Meijenfheldt, F. A. Bastiaan von, Ksenia Arkhipova, Diego D. Cambuy, Felipe H. Coutinho, and Bas E. Dutilh. 2019. "Robust Taxonomic Classification of Uncharted Microbial Sequences and Bins with CAT and BAT: Supplementary Table 1." *BioRxiv*, January. <https://doi.org/10.1101/530188>.
- Mitchell, Alex L., Teresa K. Attwood, Patricia C. Babbitt, Matthias Blum, Peer Bork, Alan Bridge, Shoshana D. Brown, et al. 2019. "InterPro in 2019: Improving Coverage, Classification and Access to Protein Sequence Annotations." *Nucleic Acids Research* 47 (D1): D351–60. <https://doi.org/10.1093/nar/gky1100>.
- Moll, Kirsten, Inger Ljungström, Hedvig Perlmann, Artur Scherf, and Mats Wahlgren. 2008. "Methods in Malarial Research" 5: 351.
- Moran, N. A. 1996. "Accelerated Evolution and Muller's Ratchet in Endosymbiotic Bacteria." *Proceedings of the National Academy of Sciences* 93 (7): 2873–78. <https://doi.org/10.1073/pnas.93.7.2873>.
- Morrison, David A. 2009. "Evolution of the Apicomplexa: Where Are We Now?" *Trends in Parasitology* 25 (8): 375–82. <https://doi.org/10.1016/j.pt.2009.05.010>.
- Muñoz-Gómez, Sergio A., Keira Durnin, Laura Eme, Christopher Paight, Christopher E. Lane, Mary B. Saffo, and Claudio H. Slamovits. 2019. "Nephromyces Represents a Diverse and Novel Lineage of the Apicomplexa That Has Retained Apicoplasts." *Genome Biology and Evolution* 11 (10): 2727–40. <https://doi.org/10.1093/gbe/evz155>.
- Muñoz-Gómez, Sergio A., Sebastian Hess, Gertraud Burger, B Franz Lang, Edward Susko, Claudio H Slamovits, and Andrew J Roger. 2019. "An Updated Phylogeny of the Alphaproteobacteria Reveals That the Parasitic *Rickettsiales* and *Holosporales* Have Independent Origins." *eLife* 8 (February): e42535. <https://doi.org/10.7554/eLife.42535>.
- Nakayama, K., K. Kurokawa, M. Fukuhara, H. Urakami, S. Yamamoto, K. Yamazaki, Y. Ogura, T. Ooka, and T. Hayashi. 2010. "Genome Comparison and Phylogenetic Analysis of *Orientia Tsutsugamushi* Strains." *DNA Research* 17 (5): 281–91. <https://doi.org/10.1093/dnares/dsq018>.
- Nguyen L.-T., Schmidt, H.A., Haeseler, A. von, Minh, B.Q. (2015) IQ-TREE: A fast and effective stochastic algorithm for estimating maximum likelihood phylogenies. *Mol. Biol. Evol.*, 32:268-274. <https://doi.org/10.1093/molbev/msu300>.
- Nolfi, James R. 1970. "Biosynthesis of Uric Acid in the Tunicate, *Molgula Manhattensis*, with a General Scheme for the Function of Stored Purines in Animals." *Comparative Biochemistry and Physiology* 35 (4): 827–42. [https://doi.org/10.1016/0010-406X\(70\)90078-2](https://doi.org/10.1016/0010-406X(70)90078-2).
- Nowack, Eva C. M., and Michael Melkonian. 2010. "Endosymbiotic Associations within Protists." *Philosophical Transactions of the Royal Society B: Biological Sciences* 365 (1541): 699–712. <https://doi.org/10.1098/rstb.2009.0188>.
- Paight, Christopher, Claudio H. Slamovits, Mary Beth Saffo, and Christopher E. Lane. 2019. "Nephromyces Encodes a Urate Metabolism Pathway and Predicted Peroxisomes, Demonstrating That These Are Not Ancient Losses of Apicomplexans." *Genome Biology and Evolution* 11 (1): 41–53. <https://doi.org/10.1093/gbe/evy251>.
- Paight, Christopher, Elizabeth Sage Hunter, and Christopher E. Lane. 2020. Codependence in the Nephromyces species swarm depends on heterospecific bacterial endosymbionts. *BioRxiv* [Preprint]. Available at: <https://www.biorxiv.org/content/10.1101/2020.10.18.344572v1> (Accessed October 18, 2020).

- Pappas, Georgios, Nikos Roussos, and Matthew E. Falagas. 2009. "Toxoplasmosis Snapshots: Global Status of Toxoplasma Gondii Seroprevalence and Implications for Pregnancy and Congenital Toxoplasmosis." *International Journal for Parasitology* 39 (12): 1385–94. <https://doi.org/10.1016/j.ijpara.2009.04.003>.
- Parks, Donovan H., Michael Imelfort, Connor T. Skennerton, Philip Hugenholtz, and Gene W. Tyson. 2015. "CheckM: Assessing the Quality of Microbial Genomes Recovered from Isolates, Single Cells, and Metagenomes." *Genome Research* 25 (7): 1043–55. <https://doi.org/10.1101/gr.186072.114>.
- Price, Morgan N., Paramvir S. Dehal, and Adam P. Arkin. 2010. "FastTree 2 – Approximately Maximum-Likelihood Trees for Large Alignments." *PLOS ONE* 5 (3): e9490. <https://doi.org/10.1371/journal.pone.0009490>.
- Quinlan, Aaron R., and Ira M. Hall. 2010. "BEDTools: A Flexible Suite of Utilities for Comparing Genomic Features." *Bioinformatics* 26 (6): 841–42. <https://doi.org/10.1093/bioinformatics/btq033>.
- Ritchie, Matthew E., Belinda Phipson, Di Wu, Yifang Hu, Charity W. Law, Wei Shi, and Gordon K. Smyth. 2015. "Limma Powers Differential Expression Analyses for RNA-Sequencing and Microarray Studies." *Nucleic Acids Research* 43 (7): e47–e47. <https://doi.org/10.1093/nar/gkv007>.
- Rodriguez R., Luis M, Santosh Gunturu, William T Harvey, Ramon Rosselló-Mora, James M Tiedje, James R Cole, and Konstantinos T Konstantinidis. 2018. "The Microbial Genomes Atlas (MiGA) Webserver: Taxonomic and Gene Diversity Analysis of Archaea and Bacteria at the Whole Genome Level." *Nucleic Acids Research* 46 (Web Server issue): W282–88. <https://doi.org/10.1093/nar/gky467>.
- Rodriguez-R, Luis M., and Konstantinos T. Konstantinidis. 2016. "The Enveomics Collection: A Toolbox for Specialized Analyses of Microbial Genomes and Metagenomes." e1900v1. PeerJ Inc. <https://doi.org/10.7287/peerj.preprints.1900v1>.
- Roos, David S. 2005. "Themes and Variations in Apicomplexan Parasite Biology." *Science, New Series* 309 (5731): 72–73.
- Rueckert, Sonja, Emma L. Betts, and Anastasios D. Tsaousis. 2019. "The Symbiotic Spectrum: Where Do the Gregarines Fit?" *Trends in Parasitology*, July, S1471492219301643. <https://doi.org/10.1016/j.pt.2019.06.013>.
- Rueckert, Sonja, Kevin C. Wakeman, Holger Jenke-Kodama, and Brian S. Leander. 2015. "Molecular Systematics of Marine Gregarine Apicomplexans from Pacific Tunicates, with Descriptions of Five Novel Species of Lankesteria." *International Journal of Systematic and Evolutionary Microbiology* 65 (8): 2598–2614. <https://doi.org/10.1099/ijs.0.000300>.
- Saffo, M. B. 1990. "Symbiosis within a Symbiosis: Intracellular Bacteria within the Endosymbiotic Protist Nephromyces." *Marine Biology* 107 (2): 291–96. <https://doi.org/10.1007/BF01319828>.
- Saffo, Mary Beth, Adam M. McCoy, Christopher Rieken, and Claudio H. Slamovits. 2010. "Nephromyces, a Beneficial Apicomplexan Symbiont in Marine Animals." *Proceedings of the National Academy of Sciences of the United States of America* 107 (37): 16190–95. <https://doi.org/10.1073/pnas.1002335107>.
- Saffo, Mary Beth, and Rebecca Nelson. 1983. "The cells of Nephromyces: developmental stages of a single life cycle." *Canadian Journal of Botany* 61 (12): 3230–39. <https://doi.org/10.1139/b83-360>.
- Seemann, Torsten. 2014. "Prokka: Rapid Prokaryotic Genome Annotation." *Bioinformatics* 30 (14): 2068–69. <https://doi.org/10.1093/bioinformatics/btu153>.
- Sibley, L.D. and Boothroyd, J.C. 1992. "Construction of a molecular karyotype for *Toxoplasma gondii*." *Mol. Biochem. Parasitol* 51: 291–300.
- Simão, Felipe A., Robert M. Waterhouse, Panagiotis Ioannidis, Evgenia V. Kriventseva, and Evgeny M. Zdobnov. 2015. "BUSCO: Assessing Genome Assembly and Annotation Completeness with Single-Copy Orthologs." *Bioinformatics* 31 (19): 3210–12. <https://doi.org/10.1093/bioinformatics/btv351>.
- Soldati, Dominique, Jean Francois Dubremetz, and Maryse Lebrun. 2001. "Microneme Proteins: Structural and Functional Requirements to Promote Adhesion and Invasion by the Apicomplexan Parasite Toxoplasma Gondii." *International Journal for Parasitology* 31 (12): 1293–1302. [https://doi.org/10.1016/S0020-7519\(01\)00257-0](https://doi.org/10.1016/S0020-7519(01)00257-0).
- Sow, Samba O., Khitam Muhsen, Dilruba Nasrin, William C. Blackwelder, Yukun Wu, Tamer H. Farag, Sandra Panchalingam, et al. 2016. "The Burden of Cryptosporidium Diarrheal Disease among Children < 24 Months of Age in Moderate/High Mortality Regions of Sub-Saharan Africa and South Asia, Utilizing Data from the Global Enteric Multicenter Study (GEMS)." *PLoS Neglected Tropical Diseases* 10 (5). <https://doi.org/10.1371/journal.pntd.0004729>.
- Spalding, Maroya D., and Sean T. Prigge. 2010. "Lipoic Acid Metabolism in Microbial Pathogens." *Microbiology and Molecular Biology Reviews* : MMBR 74 (2): 200–228. <https://doi.org/10.1128/MMBR.00008-10>.

- Suja, Girija, V. Kripa, Kollyiyil Mohamed, Shamal Pothodi, and N K Sanil. 2016. "Nematopsis Sp. (Apicomplexa: Porosporidae) Infection in Crassostrea Madrasensis and Its Associated Histopathology." *Journal of the Marine Biological Association of India* 58 (January): 29–33. <https://doi.org/10.6024/jmbai.2016.58.1.1890-04>.
- Syberg-Olsen, M., A. Garber, J. McCutcheon, & F. Husnik 2018: Pseudofinder, GitHub repository: <https://github.com/filip-husnik/pseudo-finder/>.
- "TaxonKit - NCBI Taxonomy Toolkit." n.d. Accessed February 7, 2020. <https://bioinf.shenwei.me/taxonkit/>.
- Tymoshenko, Stepan, Rebecca D. Oppenheim, Rasmus Agren, Jens Nielsen, Dominique Soldati-Favre, and Vassily Hatzimanikatis. 2015. "Metabolic Needs and Capabilities of Toxoplasma Gondii through Combined Computational and Experimental Analysis." Edited by Costas D. Maranas. *PLOS Computational Biology* 11 (5): e1004261. <https://doi.org/10.1371/journal.pcbi.1004261>.
- Votýpka, Jan, David Modrý, Miroslav Oborník, Jan Šlapeta, and Julius Lukeš. 2016. "Apicomplexa." In *Handbook of the Protists*, edited by John M. Archibald, Alastair G.B. Simpson, Claudio H. Slamovits, Lynn Margulis, Michael Melkonian, David J. Chapman, and John O. Corliss, 1–58. Cham: Springer International Publishing. [https://doi.org/10.1007/978-3-319-32669-6\\_20-1](https://doi.org/10.1007/978-3-319-32669-6_20-1).
- Wick, Ryan R., Mark B. Schultz, Justin Zobel, and Kathryn E. Holt. 2015. "Bandage: Interactive Visualization of *de Novo* Genome Assemblies: Fig. 1." *Bioinformatics* 31 (20): 3350–52. <https://doi.org/10.1093/bioinformatics/btv383>.
- Woo, Yong H, Hifzur Ansari, Thomas D Otto, Christen M Klinger, Martin Kolisko, Jan Michálek, Alka Saxena, et al. 2015. "Chromerid Genomes Reveal the Evolutionary Path from Photosynthetic Algae to Obligate Intracellular Parasites." Edited by Magnus Nordborg. *ELife* 4 (July): e06974. <https://doi.org/10.7554/eLife.06974>.
- Yurchenko, Tatiana, Tereza Ševčíková, Pavel Příbyl, Khalid El Karkouri, Vladimír Klimeš, Raquel Amaral, Veronika Zbránková, et al. 2018. "A Gene Transfer Event Suggests a Long-Term Partnership between Eustigmatophyte Algae and a Novel Lineage of Endosymbiotic Bacteria." *The ISME Journal* 12 (9): 2163–75. <https://doi.org/10.1038/s41396-018-0177-y>.

Table 1: Statistics for the genomic and transcriptomic datasets presented. MiGA was used to assess the bacterial genome completeness, and BUSCO was used to assess the *Cardiosporidium cionae* genome and transcriptome.

| Assembly                 | Contigs | Size<br>(Mb) | N50<br>(kb) | N90<br>(kb) | G/C<br>(%) | Proteins | Completeness<br>(%) | Duplication<br>(%) |
|--------------------------|---------|--------------|-------------|-------------|------------|----------|---------------------|--------------------|
| <i>C. cionae</i> (DNA)   | 2,213   | 57           | 54.12       | 15.21       | 34.4       | 4,692    | 63.7                | 13.9               |
| $\alpha$ -proteobacteria | 29      | 1.05         | 250.39      | 36.72       | 29.1       | 906      | 91.9                | 1.9                |
| <i>C. cionae</i> (RNA)   | -       | -            | -           | -           | -          | 6,733    | 60.0                | 4.6                |

Supplementary Table 1: Closely related reference genomes used for annotation of the *Cardiosporidium cionae*  $\alpha$ -endosymbiont, downloaded from GenBank, refseq.

| <b><i>Rickettsia</i> reference genomes</b> | <b>RefSeq Accession</b> |
|--------------------------------------------|-------------------------|
| <i>Rickettsia conorii</i> str. Malish 7    | GCF_000007025.1         |
| <i>Rickettsia felis</i> str. Pedreira      | GCF_000964665.1         |
| <i>Rickettsia japonica</i> YH              | GCF_000283595.1         |
| <i>Rickettsia massiliae</i> MTU5           | GCF_000016625.1         |
| <i>Rickettsia peacockii</i> str. Rustic    | GCF_000021525.1         |
| <i>Rickettsia prowazekii</i> str. Breinl   | GCF_000367405.1         |
| <i>Rickettsia typhi</i> str. Wilmington    | GCF_000008045.1         |
| <i>Rickettsia bellii</i> RML369-C          | GCF_000012385.1         |

Supplementary Table 2: Key functional genes annotations from the genome and transcriptome of *Cardiosporidium cionae*, corresponding to those seen in Figure 2, beginning with the top middle slice and moving clockwise. Annotations are based on functional predictions from KEGG and referenced by the corresponding K-Number.

| Pathway/Step                                           | Description                                                        | KNUM   | DNA | RNA |
|--------------------------------------------------------|--------------------------------------------------------------------|--------|-----|-----|
| <b>Glycolysis, glucose =&gt; pyruvate</b>              |                                                                    |        |     |     |
|                                                        | <b>1</b> hexokinase                                                | K00844 | x   | x   |
|                                                        | <b>2</b> glucose-6-phosphate isomerase                             | K01810 | x   | x   |
|                                                        | <b>3</b> 6-phosphofructokinase 1                                   | K00805 |     |     |
|                                                        | <b>4</b> fructose-1,6-bisphosphate aldolase                        | K01623 | x   | x   |
|                                                        | <b>5</b> triosephosphate isomerase (TIM)                           | K01803 | x   | x   |
|                                                        | <b>6</b> glyceraldehyde 3-phosphate dehydrogenase                  | K00134 | x   | x   |
|                                                        | <b>7</b> phosphoglycerate kinase                                   | K00927 | x   | x   |
|                                                        | <b>8</b> 2,3-bisphosphoglycerate-dependent phosphoglycerate mutase | K01834 | x   | x   |
|                                                        | <b>9</b> enolase                                                   | K01689 | x   | x   |
|                                                        | <b>10</b> pyruvate kinase                                          | K00873 | x   | x   |
| <b>Gluconeogenesis, oxaloacetate =&gt; fructose-6P</b> |                                                                    |        |     |     |
|                                                        | <b>1</b> phosphoenolpyruvate carboxykinase (ATP)                   | K01610 | x   | x   |
|                                                        | <b>2</b> enolase                                                   | K01689 | x   | x   |
|                                                        | <b>3</b> 2,3-bisphosphoglycerate-dependent phosphoglycerate mutase | K01834 | x   | x   |
|                                                        | <b>4</b> phosphoglycerate kinase                                   | K00927 | x   | x   |
|                                                        | <b>5</b> glyceraldehyde 3-phosphate dehydrogenase                  | K00134 | x   | x   |
|                                                        | <b>6</b> triosephosphate isomerase (TIM)                           | K01803 | x   | x   |
|                                                        | <b>7</b> fructose-bisphosphate aldolase, class I                   | K01623 | x   | x   |
|                                                        | <b>8</b> fructose-1,6-bisphosphatase I + II                        | K03841 | x   | x   |
| <b>Pyruvate Oxidation, pyruvate =&gt; acetyl-CoA</b>   |                                                                    |        |     |     |
|                                                        | <b>1</b> pyruvate dehydrogenase E1 component alpha subunit         | K00161 | x   | x   |
|                                                        | <b>2</b> pyruvate dehydrogenase E1 component                       | K00162 | x   |     |

|                                  |                                                                                  |        |   |   |
|----------------------------------|----------------------------------------------------------------------------------|--------|---|---|
|                                  | beta subunit                                                                     |        |   |   |
| <b>3</b>                         | pyruvate dehydrogenase E2 component (dihydrolipoamide acetyltransferase)         | K00627 | x | x |
| <b>4</b>                         | dihydrolipoamide dehydrogenase                                                   | K00382 |   | x |
| <b>5</b>                         | dihydrolipoamide dehydrogenase-binding protein of pyruvate dehydrogenase complex | K13997 | x |   |
| <b>Citric Acid Cycle</b>         |                                                                                  |        |   |   |
| <b>1</b>                         | citrate synthase                                                                 | K01647 | x | x |
| <b>2</b>                         | aconitate hydratase                                                              | K01681 | x | x |
| <b>3</b>                         | isocitrate dehydrogenase                                                         | K00031 | x | x |
| <b>4</b>                         | 2-oxoglutarate dehydrogenase E1 component                                        | K00164 | x | x |
| <b>5</b>                         | 2-oxoglutarate dehydrogenase E2 component (dihydrolipoamide succinyltransferase) | K00658 | x | x |
| <b>6</b>                         | pyruvate dehydrogenase complex subunit PDH-E3I                                   | K00382 |   | x |
| <b>7</b>                         | succinyl-CoA synthetase alpha subunit                                            | K01899 | x | x |
| <b>8</b>                         | succinyl-CoA synthetase beta subunit                                             | K01900 | x | x |
| <b>9</b>                         | succinate dehydrogenase (ubiquinone) flavoprotein subunit                        | K00234 | x | x |
| <b>10</b>                        | succinate dehydrogenase (ubiquinone) iron-sulfur subunit                         | K00235 | x | x |
| <b>11</b>                        | succinate dehydrogenase (ubiquinone) cytochrome b560 subunit                     | K00236 |   |   |
| <b>12</b>                        | succinate dehydrogenase (ubiquinone) membrane anchor subunit                     | K00237 |   |   |
| <b>13</b>                        | fumarate hydratase, class II                                                     | K01679 | x |   |
| <b>14</b>                        | malate dehydrogenase                                                             | K00024 | x | x |
| <b>Pentose Phosphate Pathway</b> |                                                                                  |        |   |   |
| <b>1</b>                         | glucose-6-phosphate 1-dehydrogenase                                              | K00036 | x | x |
| <b>2</b>                         | 6-phosphogluconolactonase                                                        | K01057 |   |   |
| <b>3</b>                         | 6-phosphogluconate dehydrogenase                                                 | K00033 |   | x |
| <b>4</b>                         | ribulose-phosphate 3-epimerase                                                   | K01783 | x |   |
| <b>5</b>                         | ribose 5-phosphate isomerase A                                                   | K01807 | x | x |
| <b>6</b>                         | transketolase                                                                    | K00615 | x | x |
| <b>7</b>                         | transaldolase                                                                    | K00616 | x | x |



|                                                                         |          |                                                                          |        |   |   |
|-------------------------------------------------------------------------|----------|--------------------------------------------------------------------------|--------|---|---|
|                                                                         | <b>8</b> | glucose-6-phosphate isomerase                                            | K01810 | x | x |
| <b>Glyoxylate Cycle</b>                                                 |          |                                                                          |        |   |   |
|                                                                         | <b>1</b> | citrate synthase                                                         | K01647 | x | x |
|                                                                         | <b>2</b> | aconitate hydratase                                                      | K01681 | x | x |
|                                                                         | <b>3</b> | isocitrate lyase                                                         | K01637 |   |   |
|                                                                         | <b>4</b> | malate synthase                                                          | K01638 |   |   |
|                                                                         | <b>5</b> | malate dehydrogenase                                                     | K00024 | x | x |
| <b>Fatty Acid Biosynthesis (Initiation)</b>                             |          |                                                                          |        |   |   |
|                                                                         | <b>1</b> | acetyl-CoA carboxylase / biotin carboxylase 1                            | K11262 | x | x |
|                                                                         | <b>2</b> | [acyl-carrier-protein] S-malonyltransferase                              | K00645 | x | x |
|                                                                         | <b>3</b> | 3-oxoacyl-[acyl-carrier-protein] synthase III                            | K00648 |   | x |
| <b>Fatty Acid Biosynthesis (Elongation)</b>                             |          |                                                                          |        |   |   |
|                                                                         | <b>1</b> | 3-oxoacyl-[acyl-carrier-protein] synthase II                             | K09458 | x | x |
|                                                                         | <b>2</b> | 3-oxoacyl-[acyl-carrier protein] reductase                               | K00059 | x |   |
|                                                                         | <b>3</b> | beta-hydroxyacyl-acyl carrier protein dehydratase (FABZ)                 | K02372 | x | x |
|                                                                         | <b>4</b> | enoyl-[acyl-carrier protein] reductase I                                 | K00208 | x | x |
| <b>Cholesterol Biosynthesis, squalene 2,3-epoxide =&gt; cholesterol</b> |          |                                                                          |        |   |   |
|                                                                         | <b>1</b> | lanosterol synthase                                                      | K01852 |   |   |
|                                                                         | <b>2</b> | sterol 14alpha-demethylase                                               | K05917 |   |   |
|                                                                         | <b>3</b> | Delta14-sterol reductase                                                 | K00222 |   |   |
|                                                                         | <b>4</b> | methylsterol monooxygenase                                               | K07750 |   | x |
|                                                                         | <b>5</b> | sterol-4alpha-carboxylate 3-dehydrogenase (decarboxylating)              | K07748 |   |   |
|                                                                         | <b>6</b> | 17beta-estradiol 17-dehydrogenase / 3beta-hydroxysteroid 3-dehydrogenase | K13373 |   |   |
|                                                                         | <b>7</b> | Delta24-sterol reductase                                                 | K09828 |   |   |
|                                                                         | <b>8</b> | cholestenol Delta-isomerase                                              | K01824 |   |   |
|                                                                         | <b>9</b> | C-5 sterol desaturase, putative                                          | K00227 | x |   |

|                                                                                          |           |                                                                                     |        |   |   |
|------------------------------------------------------------------------------------------|-----------|-------------------------------------------------------------------------------------|--------|---|---|
|                                                                                          | <b>10</b> | 7-dehydrocholesterol reductase, putative                                            | K00213 | x | x |
| <b>Triaglycerol Biosynthesis</b>                                                         |           |                                                                                     |        |   |   |
|                                                                                          | <b>1</b>  | glycerol-3-phosphate O-acyltransferase / dihydroxyacetone phosphate acyltransferase | K13507 | x | x |
|                                                                                          | <b>2</b>  | glycerol-3-phosphate O-acyltransferase                                              | K00655 |   | x |
|                                                                                          | <b>2</b>  | 1-acyl-sn-glycerol-3-phosphate acyltransferase                                      | K22831 | x |   |
|                                                                                          | <b>3</b>  | 1-acylglycerol-3-phosphate O-acyltransferase                                        |        |   |   |
|                                                                                          | <b>4</b>  | diacylglycerol O-acyltransferase 1                                                  | K11155 | x | x |
| <b>Ketone Body Biosynthesis, acetyl-CoA =&gt; acetoacetate/3-hydroxybutyrate/acetone</b> |           |                                                                                     |        |   |   |
|                                                                                          | <b>1</b>  | acetoacetate decarboxylase                                                          | K01574 |   |   |
|                                                                                          | <b>2</b>  | 3-hydroxybutyrate dehydrogenase                                                     | K00019 | x |   |
|                                                                                          | <b>3</b>  | acetyl-CoA C-acetyltransferase                                                      | K00626 | x | x |
|                                                                                          | <b>4</b>  | hydroxymethylglutaryl-CoA synthase                                                  | K01641 |   |   |
|                                                                                          | <b>5</b>  | hydroxymethylglutaryl-CoA lyase                                                     | K01640 | x |   |
| <b>Beta Oxidation</b>                                                                    |           |                                                                                     |        |   |   |
|                                                                                          | <b>1</b>  | acyl-CoA oxidase                                                                    | K00232 | x | x |
|                                                                                          | <b>2</b>  | enoyl-CoA hydratase                                                                 | K07511 | x | x |
|                                                                                          | <b>3</b>  |                                                                                     |        |   |   |
|                                                                                          | <b>4</b>  | acetyl-CoA acyltransferase                                                          | K07513 | x | x |
| <b>IMP Biosynthesis</b>                                                                  |           |                                                                                     |        |   |   |
|                                                                                          | <b>1</b>  | amidophosphoribosyltransferase                                                      | K00764 |   | x |
|                                                                                          | <b>2</b>  | phosphoribosylamine---glycine ligase                                                | K01945 | x |   |
|                                                                                          | <b>3</b>  | Trifunctional GART (fragment)                                                       | K11787 |   | x |
|                                                                                          | <b>4</b>  | phosphoribosylformylglycinamide synthase                                            | K01952 |   | x |
|                                                                                          | <b>5</b>  | Trifunctional GART (fragment)                                                       | K11787 |   | x |
|                                                                                          | <b>6</b>  | phosphoribosylaminoimidazole-succinocarboxamide synthase                            | K01923 | x | x |
|                                                                                          | <b>7</b>  | adenylosuccinate lyase                                                              | K01756 | x |   |

|                                                      |                                                                    |        |   |   |
|------------------------------------------------------|--------------------------------------------------------------------|--------|---|---|
|                                                      | <b>8</b> phosphoribosylaminoimidazolecarboxamide formyltransferase | K00602 | x |   |
| <b>Guanine Biosynthesis</b>                          |                                                                    |        |   |   |
|                                                      | <b>1</b> IMP dehydrogenase                                         | K00088 | x | x |
|                                                      | <b>2</b> GMP synthase (glutamine-hydrolysing)                      | K01951 | x | x |
|                                                      | <b>3</b> guanylate kinase                                          | K00942 | x | x |
|                                                      | <b>4</b> pyruvate kinase                                           | K00873 | x | x |
|                                                      | <b>4</b> nucleoside-diphosphate kinase                             | K00940 | x |   |
| <b>Adenine Biosynthesis</b>                          |                                                                    |        |   |   |
|                                                      | <b>1</b> adenylosuccinate lyase                                    | K00939 | x |   |
|                                                      | <b>2</b> adenylosuccinate synthase                                 | K01756 | x | x |
|                                                      | <b>3</b> adenylate kinase                                          | K01939 | x | x |
|                                                      | <b>4</b> nucleoside-diphosphate kinase                             | K00940 | x |   |
|                                                      | <b>4</b> pyruvate kinase                                           | K00873 | x | x |
| <b>Pyrimidine Biosynthesis (ribonucleotide)</b>      |                                                                    |        |   |   |
|                                                      | <b>1</b> UMP-CMP kinase                                            | K13800 | x | x |
|                                                      | <b>2</b> nucleoside-diphosphate kinase                             | K00940 | x |   |
|                                                      | <b>3</b> CTP synthase                                              | K01937 | x | x |
| <b>Pyrimidine Biosynthesis (deoxyribonucleotide)</b> |                                                                    |        |   |   |
|                                                      | <b>1</b> ribonucleoside-diphosphate reductase subunit M1           | K10807 | x | x |
|                                                      | <b>2</b> ribonucleoside-diphosphate reductase subunit M2           | K10808 | x | x |
|                                                      | <b>3</b> nucleoside-diphosphate kinase                             | K00940 | x |   |
|                                                      | <b>4</b>                                                           |        |   |   |
|                                                      | <b>5</b> dCTP deaminase                                            | K01494 |   |   |
|                                                      | <b>6</b> dUTP pyrophosphatase                                      | K01520 | x | x |
|                                                      | <b>7</b> dihydrofolate reductase / thymidylate synthase            | K13998 |   | x |
|                                                      | <b>8</b> thymidylate kinase                                        | K00943 | x | x |
|                                                      | <b>9</b> nucleoside-diphosphate kinase                             | K00940 | x |   |
| <b>Uridine Biosynthesis</b>                          |                                                                    |        |   |   |

|                                                                    |          |                                           |        |   |   |
|--------------------------------------------------------------------|----------|-------------------------------------------|--------|---|---|
|                                                                    | <b>1</b> | aspartate carbamoyltransferase            |        | x |   |
|                                                                    | <b>1</b> | carbamoyl-phosphate synthase              | K11541 |   | x |
|                                                                    | <b>1</b> | dihydroorotase                            | K01465 | x | x |
|                                                                    | <b>2</b> | dihydroorotate dehydrogenase              | K00254 | x | x |
|                                                                    | <b>3</b> | orotate phosphoribosyltransferase         | K00762 | x |   |
|                                                                    | <b>4</b> | orotidine-5'-phosphate decarboxylase      | K01591 | x | x |
| <b>Alanine, pyruvate =&gt; alanine (L)</b>                         |          |                                           |        |   |   |
|                                                                    | <b>1</b> | alanine dehydrogenase                     | K00259 | x |   |
| <b>Arginine</b>                                                    |          |                                           |        |   |   |
|                                                                    |          | N/A                                       |        |   |   |
| <b>Asparagine, pyruvate =&gt; asparagine</b>                       |          |                                           |        |   |   |
|                                                                    | <b>1</b> | pyruvate carboxylase                      | K01958 | x |   |
|                                                                    | <b>2</b> | aspartate aminotransferase, cytoplasmic   | K14454 | x | x |
|                                                                    | <b>2</b> | aspartate aminotransferase, mitochondrial | K14455 | x | x |
|                                                                    | <b>3</b> | asparagine synthase                       | K01953 | x | x |
| <b>Aspartic Acid, pyruvate =&gt; aspartate</b>                     |          |                                           |        |   |   |
|                                                                    | <b>1</b> | pyruvate carboxylase                      | K01958 | x |   |
|                                                                    | <b>2</b> | aspartate aminotransferase, cytoplasmic   | K14454 | x | x |
|                                                                    | <b>2</b> | aspartate aminotransferase, mitochondrial | K14455 | x | x |
| <b>Cysteine biosynthesis, homocysteine + serine =&gt; cysteine</b> |          |                                           |        |   |   |
|                                                                    | <b>1</b> | cystathionine beta-synthase               | K01697 | x |   |
|                                                                    | <b>2</b> | cystathionine gamma-lyase                 | K01758 |   |   |
| <b>Glutamic Acid</b>                                               |          |                                           |        |   |   |
|                                                                    | <b>1</b> | pyruvate carboxylase                      | K01958 | x |   |
|                                                                    | <b>2</b> | citrate synthase                          | K01647 | x | x |
|                                                                    | <b>3</b> | aconitate hydratase                       | K01681 | x | x |
|                                                                    | <b>4</b> | isocitrate dehydrogenase                  | K00031 | x | x |
|                                                                    | <b>5</b> | aspartate aminotransferase, cytoplasmic   | K14454 | x | x |
| <b>Glutamine, pyruvate =&gt; glutamine</b>                         |          |                                           |        |   |   |

|                                                                             |          |                                                                                                 |        |   |   |
|-----------------------------------------------------------------------------|----------|-------------------------------------------------------------------------------------------------|--------|---|---|
|                                                                             | <b>1</b> | pyruvate carboxylase                                                                            | K01958 | x | x |
|                                                                             | <b>2</b> | citrate synthase                                                                                | K01647 | x | x |
|                                                                             | <b>3</b> | aconitate hydratase                                                                             | K01681 | x | x |
|                                                                             | <b>4</b> | isocitrate dehydrogenase                                                                        | K00031 | x | x |
|                                                                             | <b>5</b> | aspartate aminotransferase, cytoplasmic                                                         | K14454 | x | x |
|                                                                             | <b>6</b> | glutamine synthetase                                                                            | K01915 | x | x |
| <b>Glycine, glyoxylate =&gt; glycine</b>                                    |          |                                                                                                 |        |   |   |
|                                                                             | <b>1</b> | alanine-glyoxylate transaminase / serine-glyoxylate transaminase / serine-pyruvate transaminase | K00830 |   | x |
| <b>Glycine, 3P-D-Glycerate =&gt; glycine</b>                                |          |                                                                                                 |        |   |   |
|                                                                             | <b>1</b> | D-3-phosphoglycerate dehydrogenase / 2-oxoglutarate reductase                                   | K00058 | x | x |
|                                                                             | <b>2</b> | phosphoserine aminotransferase                                                                  | K00831 | x |   |
|                                                                             | <b>3</b> | phosphoserine phosphatase                                                                       | K01079 | x | x |
|                                                                             | <b>4</b> | glycine hydroxymethyltransferase                                                                | K00600 |   |   |
| <b>Histidine</b> N/A                                                        |          |                                                                                                 |        |   |   |
| <b>Isoleucine</b> N/A                                                       |          |                                                                                                 |        |   |   |
| <b>Leucine</b> N/A                                                          |          |                                                                                                 |        |   |   |
| <b>Lysine</b> N/A                                                           |          |                                                                                                 |        |   |   |
| <b>Methionine biosynthesis, aspartate =&gt; homoserine =&gt; methionine</b> |          |                                                                                                 |        |   |   |
|                                                                             | <b>1</b> | bifunctional aspartokinase / homoserine dehydrogenase 1                                         | K12524 | x | x |
|                                                                             | <b>2</b> | aspartate-semialdehyde dehydrogenase                                                            | K00133 | x | x |
|                                                                             | <b>3</b> | bifunctional aspartokinase / homoserine dehydrogenase 1                                         | K12524 | x | x |
|                                                                             | <b>4</b> |                                                                                                 |        |   |   |
|                                                                             | <b>5</b> | cystathionine gamma-synthase                                                                    | K01739 |   |   |
|                                                                             | <b>6</b> |                                                                                                 |        |   |   |
|                                                                             | <b>7</b> | 5-methyltetrahydropteroyltriglutamate--homocysteine methyltransferase                           | K00549 | x | x |
| <b>Phenylalanine, phosphoenol-pyruvate =&gt;</b>                            |          |                                                                                                 |        |   |   |

|                                                                                           |                                                                           |        |   |   |
|-------------------------------------------------------------------------------------------|---------------------------------------------------------------------------|--------|---|---|
| <b>phenylalanine</b>                                                                      |                                                                           |        |   |   |
|                                                                                           | <b>1</b> 3-deoxy-7-phosphoheptulonate synthase                            | K03856 |   |   |
|                                                                                           | <b>2</b> 3-dehydroquinate synthase                                        | K01735 |   | x |
|                                                                                           | <b>3</b> pentafunctional AROM polypeptide                                 | K13830 |   | x |
|                                                                                           | <b>4</b> pentafunctional AROM polypeptide                                 | K13830 |   | x |
|                                                                                           | <b>5</b>                                                                  |        |   |   |
|                                                                                           | <b>6</b>                                                                  |        |   |   |
|                                                                                           | <b>7</b> pentafunctional AROM polypeptide                                 | K13830 |   | x |
|                                                                                           | <b>8</b> pentafunctional AROM polypeptide                                 | K13830 |   | x |
|                                                                                           | <b>9</b> chorismate synthase                                              | K01736 | x |   |
|                                                                                           | <b>10</b>                                                                 |        |   |   |
|                                                                                           | <b>11</b>                                                                 |        |   |   |
|                                                                                           | <b>12</b>                                                                 |        |   |   |
|                                                                                           | <b>13</b> aspartate aminotransferase, cytoplasmic                         | K14454 | x | x |
|                                                                                           | <b>14</b>                                                                 |        |   |   |
| <b>Proline</b>                                                                            | N/A                                                                       |        |   |   |
| <b>Serine biosynthesis,<br/>glycerate-3P =&gt;<br/>serine</b>                             |                                                                           |        |   |   |
|                                                                                           | <b>1</b> D-3-phosphoglycerate dehydrogenase /<br>2-oxoglutarate reductase | K00058 | x | x |
|                                                                                           | <b>2</b> phosphoserine aminotransferase                                   | K00831 | x |   |
|                                                                                           | <b>3</b> phosphoserine phosphatase                                        | K01079 | x | x |
| <b>Threonine<br/>biosynthesis,<br/>aspartate =&gt;<br/>homoserine =&gt;<br/>threonine</b> |                                                                           |        |   |   |
|                                                                                           | <b>1</b> bifunctional aspartokinase / homoserine<br>dehydrogenase 1       | K12524 | x | x |
|                                                                                           | <b>2</b> aspartate-semialdehyde dehydrogenase                             | K00133 | x | x |
|                                                                                           | <b>3</b> bifunctional aspartokinase / homoserine<br>dehydrogenase 1       | K12524 | x | x |
|                                                                                           | <b>4</b>                                                                  |        |   |   |
|                                                                                           | <b>5</b> threonine synthase                                               | K01733 | x | x |
| <b>Tryptophan</b>                                                                         | N/A                                                                       |        |   |   |
| <b>Tyrosine,<br/>phenylalanine =&gt;</b>                                                  |                                                                           |        |   |   |

|                 |                                                |        |   |   |
|-----------------|------------------------------------------------|--------|---|---|
| <b>tyrosine</b> |                                                |        |   |   |
|                 | <b>1</b> phenylalanine-4-hydroxylase, putative | K00500 | x | x |
| <b>Valine</b>   | no genes present                               |        |   |   |

Figure 1: System overview of *Cardiosporidium cionae* and *Nephromyces* showing tunicate host (a and e), area of localization (b and f), filamentous life stage (c and g), oocyst life stage (d and h), and vertically transferred fluorescent *in situ* hybridization (FISH) labeled bacterial endosymbionts within the oocysts (e and i). Scale bars are approximations due to resizing of images. FISH was carried out according to the method in Paight et al. 2020.

Figure 2: Overview of the metabolism of *Cardiosporidium cionae*. Solid colors indicate genomic protein homologs, dots show where homologs were only found in the transcriptome data, and bold pathways represent bacterial endosymbiont contributions. This figure corresponds to the genome and transcriptome information in supplementary table 2.

Figure 3: Apicoplast phylogeny created using a modified dataset provided by Muñoz-Gómez et al. 2019, showing the monophyly of *C. cionae* and *Nephromyces*. The complete, circularized *C. cionae* apicoplast recovered from the genomic dataset, and *Nephromyces* apicoplast sp. 654, are shown in blue. Statistical support was estimated using aLRT (1000) and ultrafast bootstrap (1000) (Nguyen et al. 2015) and these values are shown in this order on the nodes.

Figure 4: Overview of size, contig distribution, coding density, and annotations of major functional categories of genes in the  $\alpha$ -proteobacteria endosymbiont genome.

Figure 5: Alphaproteobacteria phylogeny created with GToTree pipeline (117 concatenated genes) including all sequenced alphaproteobacteria published on NCBI and both the *C. cionae* and *Nephromyces*  $\alpha$ -endosymbionts (in red). Bootstrap support is shown as a decimal value on the nodes.

Supplementary Figure 1: The annotated, circularized *Cardiosporidium cionae* apicoplast. Two *C. cionae* apicoplasts were recovered that were 99.55% similar overall and contained identical gene organization, with the SNPs localized to the *sufB* gene. The *C. cionae* apicoplasts are similar in size, organization, and gene content to the *Nephromyces* apicoplasts.

Supplementary Figure 2: Comparisons of the bacterial endosymbiont genomes in *Cardiosporidium cionae* (AlphaC) and *Nephromyces* (AlphaN, Beta, Bac). The left Venn diagram depicts orthologous groups predicted by OrthoFinder, while the right shows functional overlap predicted with KEGG.



*Molgula*  
*manhantensis*

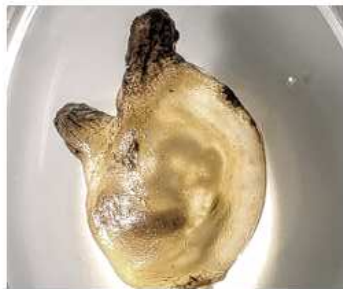

Renal sack

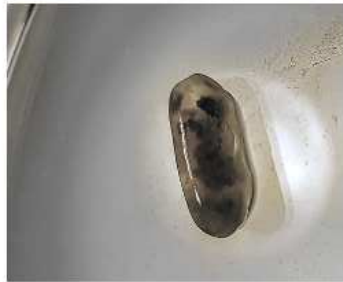

*Nephromyces* sp.  
(filamentous stage)

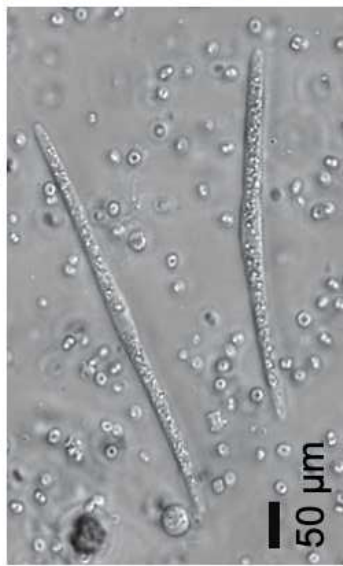

*Nephromyces* sp.  
(oocyst stage)

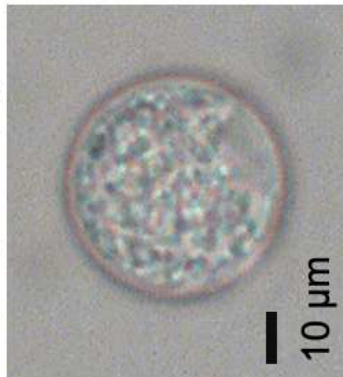

$\alpha$ -proteobacteria  
endosymbiont

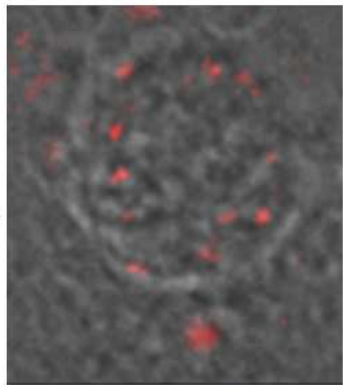

*Ciona intestinalis* Pericardial sack

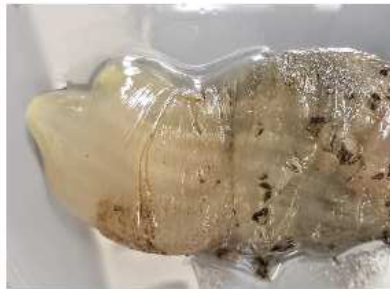

*Cardiosporidium* cionae  
(filamentous stage)

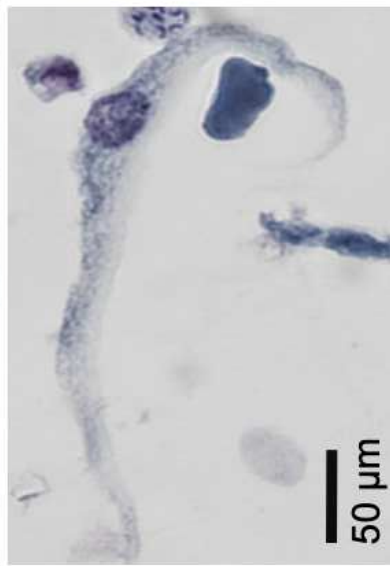

*Cardiosporidium* cionae  
(cyst stage)

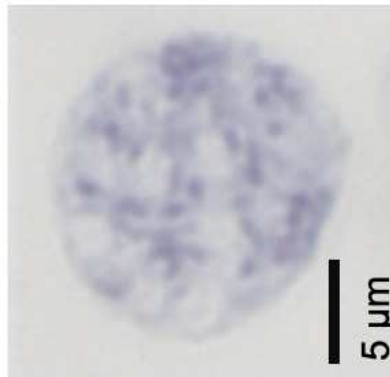

$\alpha$ -proteobacteria  
endosymbiont

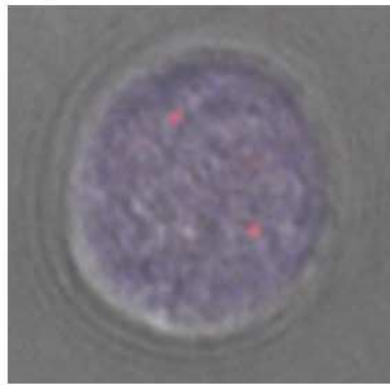

## Carbohydrate Metabolism

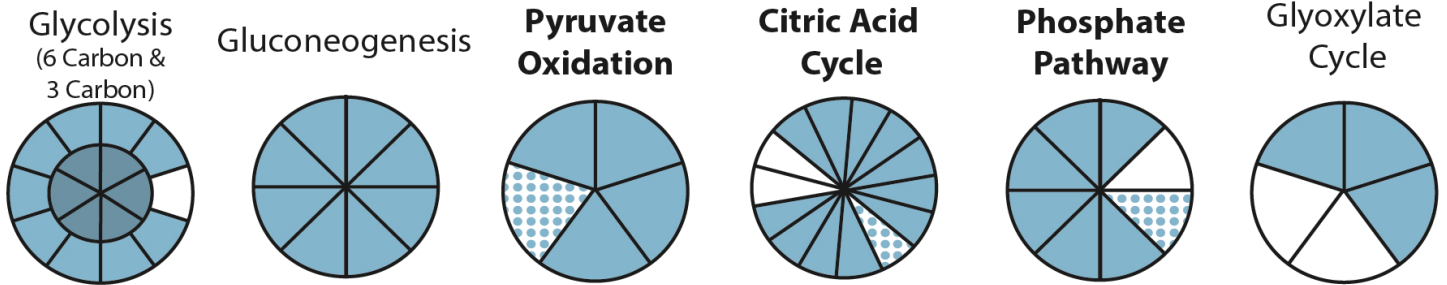

## Lipid Metabolism

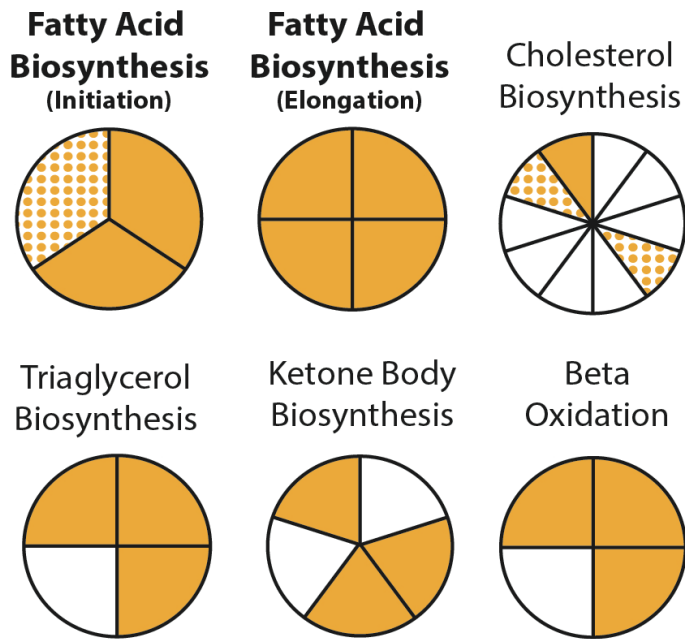

## Amino Acid Metabolism

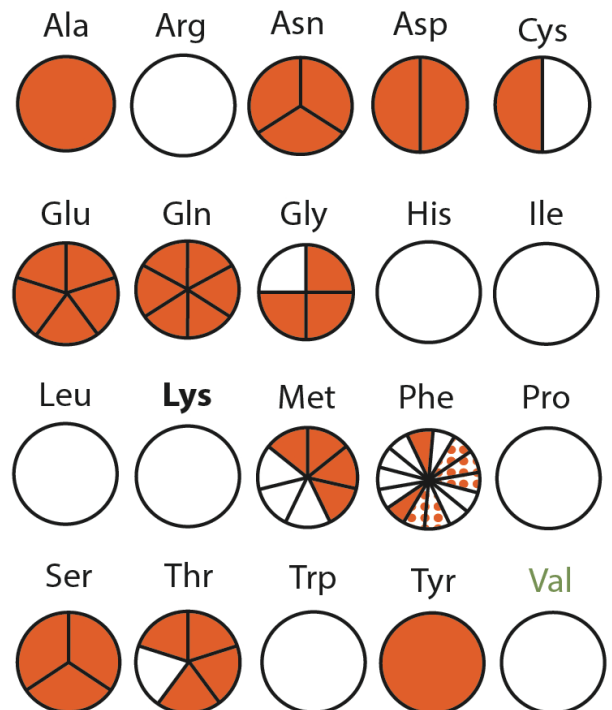

## Nucleotide Metabolism

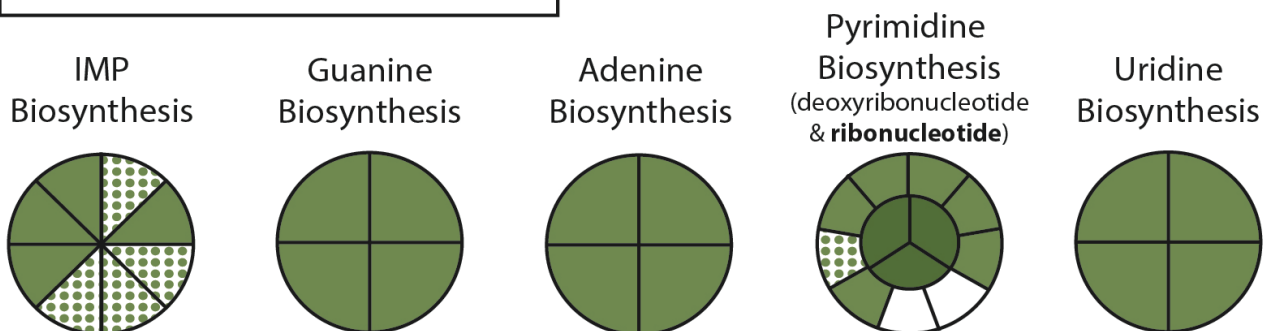

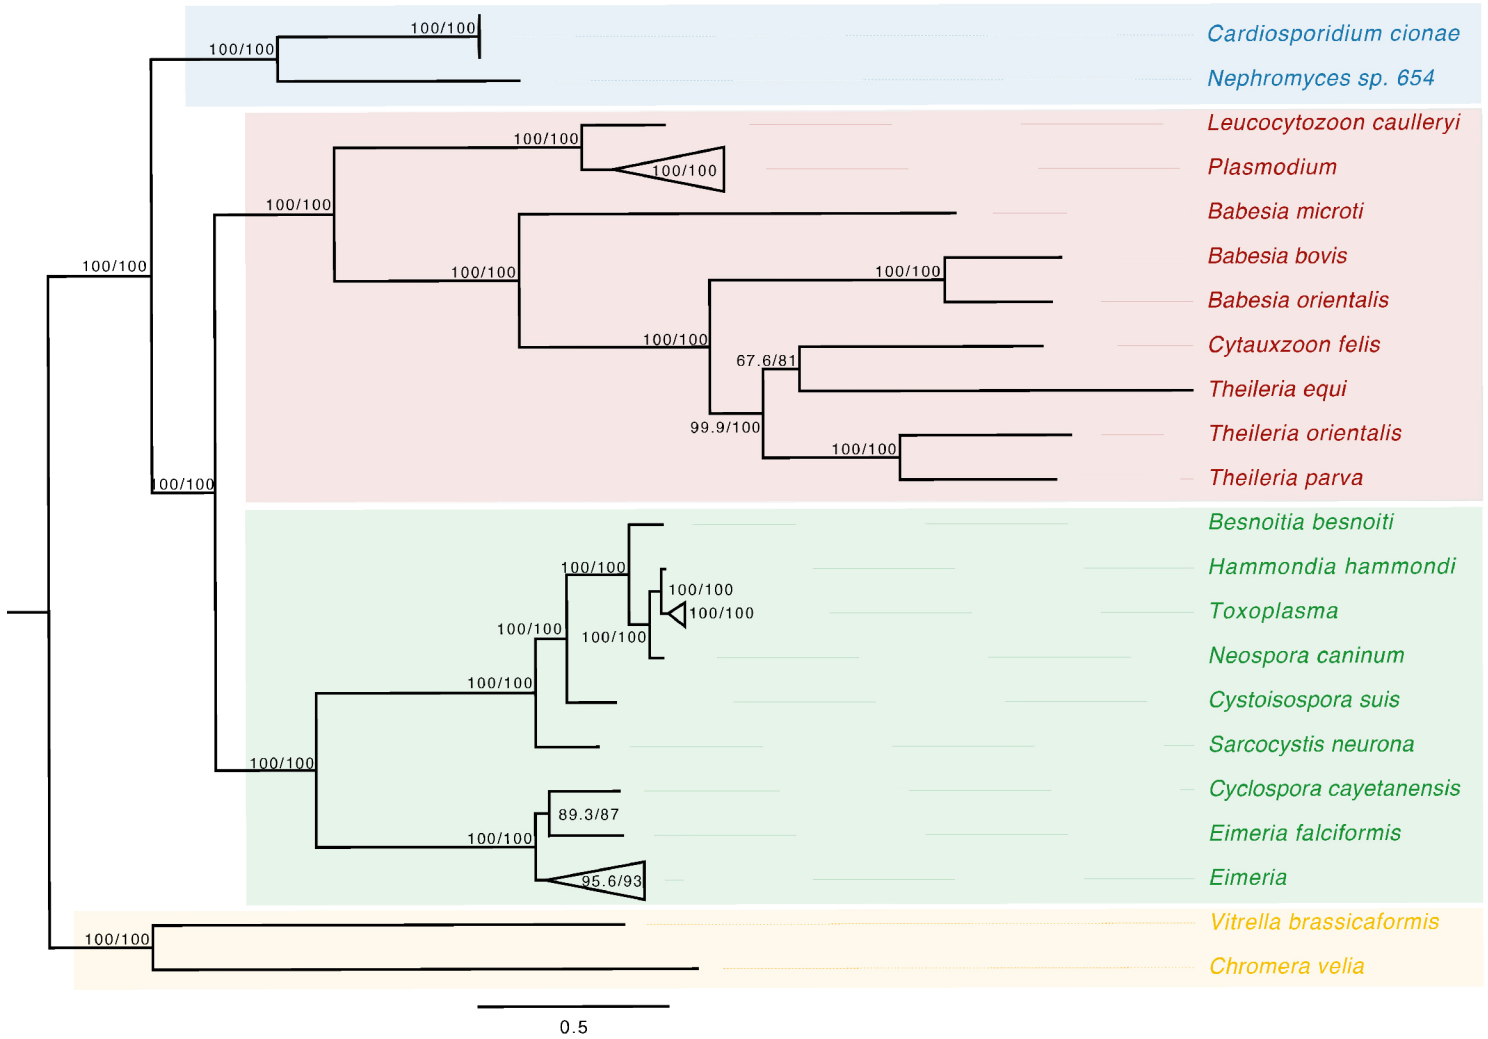

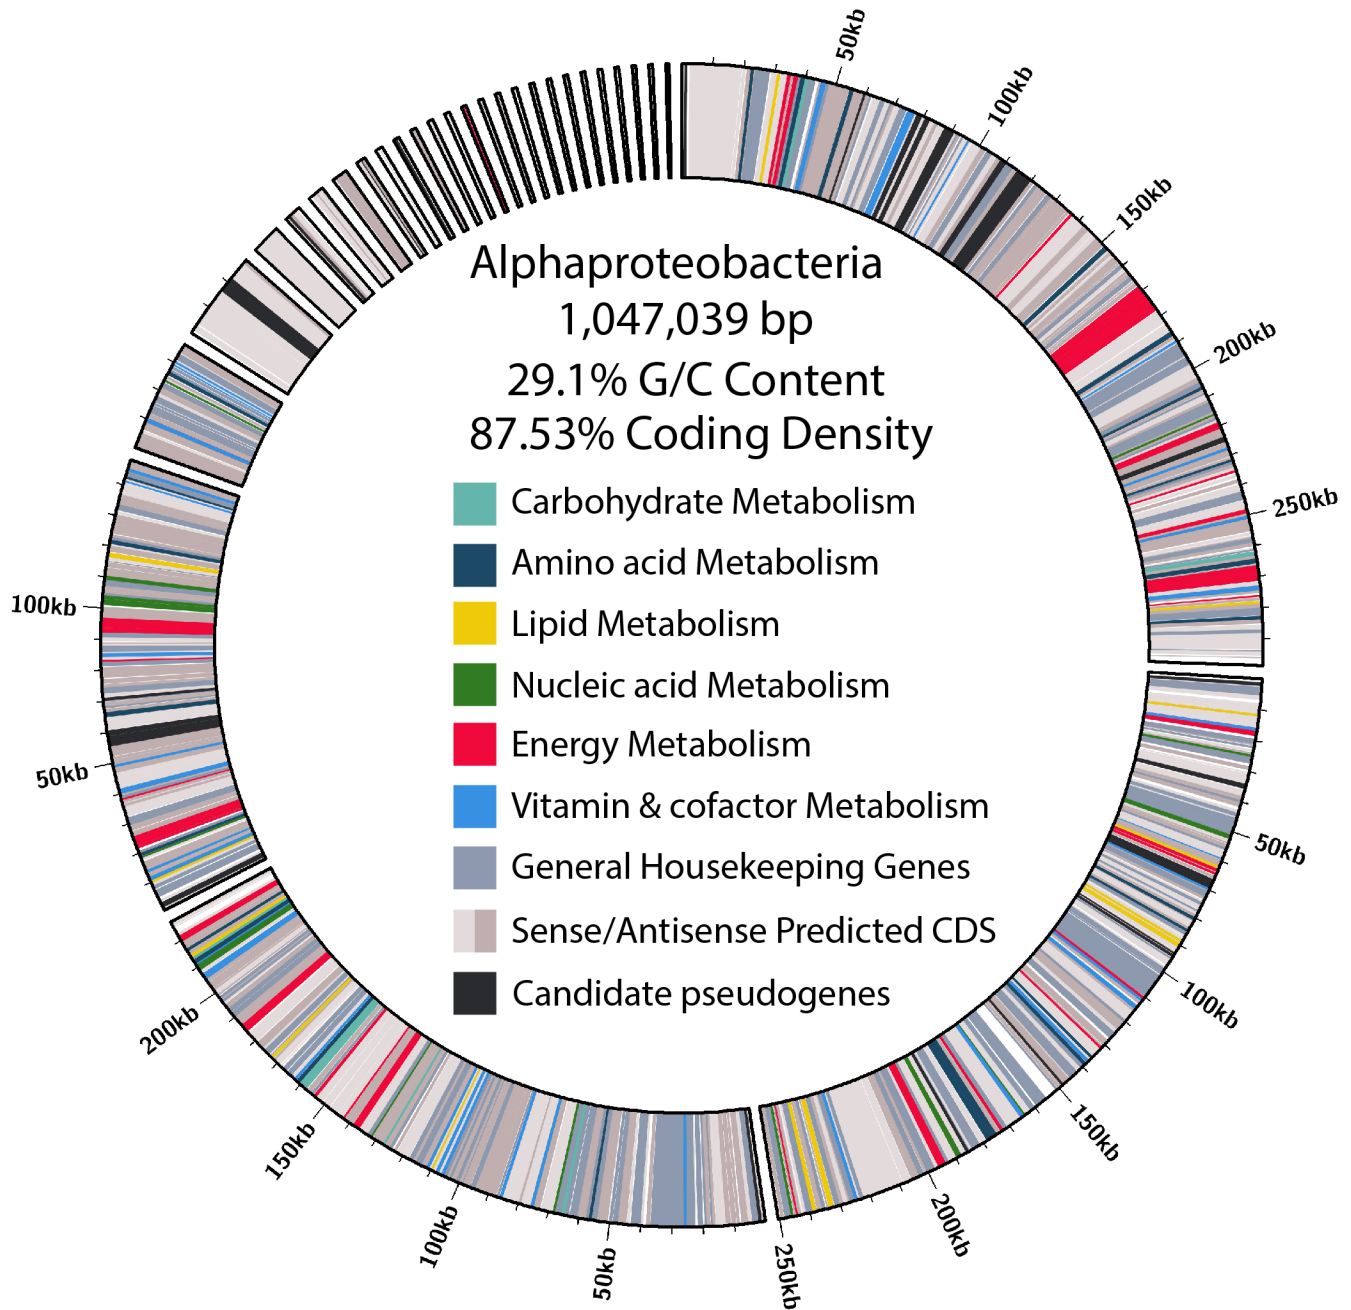

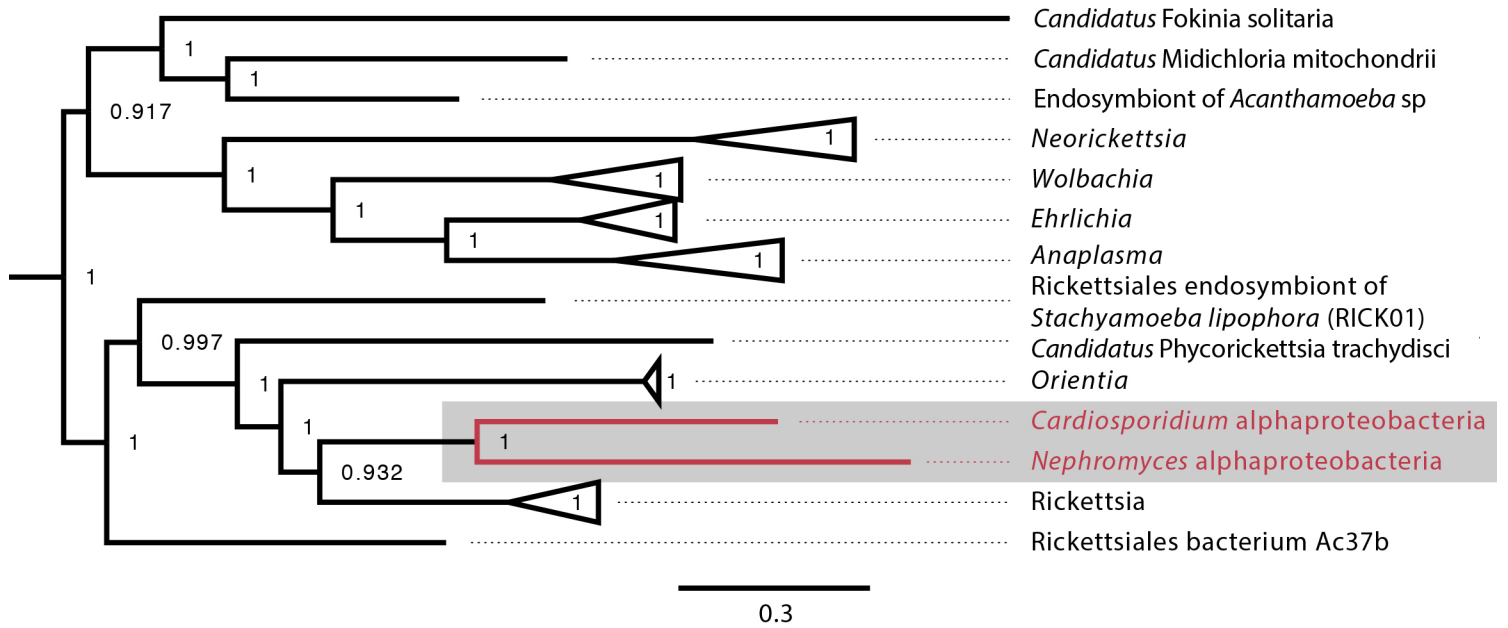

Source: https://www.biorxiv.org/content/10.1101/2020.10.19.346205v1.full.pdf
